# Establishment of pan-Influenza A (H1-H18) and pan-Influenza B (pre-split, Vic/Yam) Pseudotype Libraries for efficient vaccine antigen selection

Joanne Marie M. Del Rosario<sup>1,2,3,a</sup>, Kelly A.S. da Costa<sup>1,a</sup>, Benedikt Asbach<sup>4</sup>, Francesca Ferrara<sup>1,†</sup>, Matteo Ferrari<sup>3,5</sup>, David A. Wells<sup>3,5</sup>, Gurdip Singh Mann<sup>1</sup>, Veronica O. Ameh<sup>6,7</sup>, Claude T. Sabeta<sup>7,8</sup>, Ashley C. Banyard<sup>9</sup>, Rebecca Kinsley<sup>3,5</sup>, Simon D. Scott<sup>1</sup>, Ralf Wagner<sup>4,10</sup>, Jonathan L. Heeney<sup>3,5</sup>, George W. Carnell<sup>3,5</sup> and Nigel J. Temperton<sup>1,3,\*</sup>

<sup>1</sup> Viral Pseudotype Unit, Medway School of Pharmacy, The Universities of Greenwich and Kent at Medway, Chatham, United Kingdom

<sup>2</sup> Department of Physical Sciences and Mathematics, College of Arts and Sciences, University of the Philippines Manila, Manila, Philippines

<sup>3</sup> DIOSynVax, Cambridge, United Kingdom

<sup>4</sup> Institute of Medical Microbiology and Hygiene, University of Regensburg, Regensburg, Germany

<sup>5</sup> Department of Veterinary Medicine, University of Cambridge, Cambridge, United Kingdom

<sup>6</sup> Federal University of Agriculture Makurdi, College of Veterinary Medicine, Department of Veterinary Public Health and Preventive Medicine, P.M.B. 2373, Makurdi Bene State, Nigeria.

<sup>7</sup> University of Pretoria, Faculty of Veterinary Science, Department of Veterinary Tropical Diseases, P. Bag X04, Onderstepoort, South Africa.

<sup>8</sup> OIE Rabies Reference Laboratory, Agricultural Research Council- Onderstepoort Veterinary Research, Onderstepoort, South Africa.

<sup>9</sup> Animal and Plant Health Agency (APHA), Department of Virology, Weybridge, Surrey, United Kingdom

<sup>10</sup> Institute of Clinical Microbiology and Hygiene, University Hospital Regensburg, Regensburg, Germany

† Current Address: Vector Development and Production Laboratory, St. Jude Children's Research Hospital, Memphis, Tennessee, USA

<sup>a</sup> Authors contributed equally to this work.

\* Correspondence: [n.temperton@kent.ac.uk](mailto:n.temperton@kent.ac.uk); orcid id: <https://orcid.org/0000-0002-7978-3815>

**Abstract:** We have developed an influenza hemagglutinin (HA) pseudotype library encompassing Influenza A subtypes HA1-18, and Influenza B subtypes (both lineages) to be employed in influenza pseudotype microneutralization (pMN) assays. The pMN is highly sensitive and specific for detecting virus-specific neutralizing antibodies against influenza viruses and can be used to assess antibody functionality *in vitro*. Here we show the production of these viral HA pseudotypes and their employment as substitutes for wildtype viruses in influenza serological and neutralization assays. We demonstrate its utility in detecting serum response to vaccination with the ability to evaluate cross-subtype neutralizing responses elicited by specific vaccinating antigens. Our findings may inform further pre-clinical studies involving immunization dosing regimens in mice and may help in the creation and selection of better antigens for vaccine design. These HA pseudotypes can be harnessed to meet strategic objectives that contribute to the strengthening of global influenza surveillance, expansion of seasonal influenza prevention and control policies, and strengthening pandemic preparedness and response.

**Keywords:** influenza; hemagglutinin; pseudotype; vaccine; immunogenicity; monoclonal antibody; neutralization

## 1. Introduction

Influenza viruses are segmented, negative sense, single-stranded, enveloped RNA viruses belonging to the Orthomyxoviridae family [1, 2]. Within this family, there are three types of influenza virus that circulate in humans, influenza A, B, and C [3-5]. Only influenza A (IAV) and influenza B (IBV) viruses are endemic in the global human population, rapidly spreading around the world in seasonal epidemics; imposing considerable economic burden and death [6, 7]. From its wild bird reservoir, IAV is able to transmit from domestic poultry

[8], which is the gateway to infection of mammals, most notably, swine and humans [9]. IBV's natural reservoir is humans, however there have been reports of infection in seals [10, 11], alluding to its potential to cause disease in other species.

Influenza A, and to a lesser extent, influenza B can be further classified by structural and genetic differences in the two most abundant glycoproteins expressed on the viral surface – hemagglutinin (HA) which is required for viral entry and fusion [12-14], and neuraminidase (NA), which is involved in release of viral progeny [15]. Currently, 18 distinct antigenic HA (H1-H18) and 11 antigenic NA (N1-N11) subtypes have been described for IAV [5, 6, 16]. Based on phylogenetic analysis, IAV HA subtypes are divided into two groups: Group 1 - H1, H2, H5, H6, H8, H9, H11, H12, H13, H16, H17 and H18 subtypes, and Group 2 - H3, H4, H7, H10, H14 and H15 [15]. IBV is not as diverse and has consequently been divided into 2 distinct lineages, B/Yamagata-like and B/Victoria-like viruses [17].

Hemagglutinin is a trimeric glycoprotein consisting of a globular head attached to a fibrous stem [14, 18, 19]. The HA head is highly antigenic and is subject to mutations and re-assortment of genetic material over time [9, 20, 21]. Minor genetic changes such as single point mutations in the HA head are known to give rise to antigenic drift. In contrast, antigenic shift, wherein an influenza A virus strain acquires an HA or NA segment from another subtype of IAV usually from a zoonotic reservoir can also occur leading to the emergence of new variants or strains [20, 22-27]. Antigenic shift is of concern as it may result in the emergence of completely novel virus to which the human population has no pre-existing immunity, and as such, may have pandemic potential. To date only 3 HA (H1, H2 & H3) and 2 NA (N1 & N2) subtypes are known to have caused human pandemics [28-31]. However this does not preclude other subtypes becoming pandemic in the human population in the future and as such, the emergence of novel IAV strains remains a major concern. There have been numerous documented cases of human infection with highly pathogenic influenza A viruses (HPAI) H5 and H7, viral subtypes that predominantly cause outbreaks in poultry [32-35]. Nonetheless, these incidences have not yet resulted in these viruses acquiring the ability to sustain human to human transmission [36-38]. Whilst antigenic divergence both within and across HA subtypes exists, the HA stem domain is more conserved and although not as immunogenic as the head domain [15, 20], is increasingly being explored as a candidate for universal influenza vaccines [20, 39]. As such, the importance of studying HA structure and function and monitoring antigenic changes within HA is critical to: understanding antigenic evolution; defining the most antigenically relevant antigens for annual human vaccination programs [40, 41], determining potent universal vaccine targets [42, 43], developing vaccines for veterinary use [8, 44], and improving influenza diagnosis and therapeutic interventions [45-48].

Vaccine strain selection for seasonal influenza is carried out via the hemagglutinin inhibition (HI) assay that antigenically characterizes influenza viruses [49, 50]. The HI test works by measuring the interaction between serum antibody and the influenza HA domain of currently circulating IAV and IBV strains and the resulting inhibition of red blood cell agglutination and is currently the measure for seroconversion and protection [41, 51-53]. To improve current vaccination strategies and aid the development of a universal influenza vaccine, additional reliable tools are necessary to identify and progress promising candidates specifically targeting both the hemagglutinin head and stem domains [47, 54-56]. The advent of pseudotyped lentiviral vectors have enabled the study of HA interactions with antibodies, drugs and host cell receptors with ease [57-59]. These pseudotypes undergo abortive replication and do not give rise to replication-competent progeny [60, 61]. While it is logistically possible to deal with low pathogenic strains of influenza, studies on strains that are exotic and not widespread in the population are considerably hampered by availability of BSL facilities and highly trained and qualified personnel required for handling and processing these viruses.

To address these issues, we have constructed a comprehensive library of IAV and IBV HA pseudotypes that we tested against available antisera, HA stem-directed monoclonal antibodies, and to detect neutralizing responses in sera in mouse vaccine studies to produce optimized seasonal vaccines and candidate pandemic vaccines. This repository of pseudotypes is contributing to the World Health Organization's global influenza strategy for 2019-2030 of "Prevent, Control and Prepare" [62], with the goal of employing these PV as tools to further vaccine R&D that will contribute to reducing the burden of seasonal influenza, minimizing the risk of zoonotic influenza, and mitigating the impact of pandemic influenza.

## 2. Materials and Methods

### 2.1. Plasmid production and transformation

Hemagglutinin genes from Influenza A virus (IAV) subtypes HA1-18 and Influenza B (IBV) B/Victoria-like and B/Yamagata-like viruses were cloned in either pl.18 (in house), pHCMV1 (GenScript, Netherlands), or pEVAC plasmids (GeneArt, Germany). pl.18 is a high-copy Amp<sup>R</sup> pUC-based plasmid that permits robust mammalian gene expression in various cell types via the human cytomegalovirus (hCMV) immediate-early

107 gene promoter and the enhancer hCMV Intron A [63]. phCMV1 (Genlantis) is a constitutive mammalian  
 108 gene expression vector driven by a modified hCMV immediate-early promoter and enhancer/intron together  
 109 with a Simian Vacuolating virus 40 (SV40) promoter. Kan<sup>R</sup> and Neo<sup>R</sup> allow selection of plasmid-positive  
 110 prokaryotic and eukaryotic cells, respectively in phCMV. pEVAC is also a mammalian expression vector  
 111 with an hCMV immediate-early promoter/enhancer followed by an intron (HTLV-1-R splice donor and  
 112 hCMV-IE splice acceptor), a BGH poly-adenylation sequence and Kan<sup>R</sup> gene. All HA genes were  
 113 gene-optimized and adapted to human codon use using the GeneOptimizer algorithm [64] and have a strong  
 114 Kozak-initiation motif.

115 Influenza hemagglutinin plasmid constructs were generated by cloning the IAV or IBV HA transgenes  
 116 into pl.18, phCMV1, or pEVAC via restriction digest into the plasmids' multiple cloning site (MCS). Plasmids  
 117 were transformed in chemically induced competent *E. coli* DH5 $\alpha$  cells (Invitrogen 18265-017) via the  
 118 heat-shock method. Plasmid DNA was recovered from transformed bacterial cultures via the Plasmid Mini  
 119 Kit (Qiagen 12125) or the endotoxin-free HiSpeed Plasmid Midi Kit (Qiagen 12643). All DNA extracts were  
 120 quantified using UV spectrophotometry (NanoDrop<sup>TM</sup> -Thermo Scientific).

## 121 2.2. Propagation and maintenance of cell cultures

122 Human Embryonic Kidney (HEK) 293T/17 (ATCC: CRL-11268<sup>a</sup>) cells were used for production and ti-  
 123 tration of pseudotyped lentiviral vectors and neutralization assays. Madin-Darby Canine Kidney (MDCK) II  
 124 cells were used for titration and neutralization assays of Influenza H17 and H18 pseudotyped viruses. Both  
 125 cell lines were maintained in complete medium, Dulbecco's Modified Essential Medium (DMEM)  
 126 (PANBiotech P04-04510) with high glucose and GlutaMAX. DMEM was supplemented with 10% (v/v)  
 127 heat-inactivated Fetal Bovine Serum (PANBiotech P30-8500), and 1% (v/v) Penicillin-Streptomycin  
 128 (PenStrep) (Sigma P4333). Cells were incubated at 37°C and 5% CO<sub>2</sub>.

## 129 2.3. Transfection of influenza HA pseudotypes (PV)

130 Influenza HA pseudotypes were produced as described previously [58]. Briefly, 4x10<sup>5</sup> HEK 293T/17 cells  
 131 in complete DMEM were seeded per well of a 6-well plate and incubated at 37°C, 5% CO<sub>2</sub> overnight. The next  
 132 day, media was replaced and cells were transfected using Opti-MEM<sup>TM</sup> (Thermo Fisher Scientific 31985062)  
 133 and FuGENE<sup>®</sup> HD Transfection Reagent (ProMega E2312) with the following plasmids: HA encoding  
 134 plasmid (pl.18/phCMV1/pEVAC), luciferase reporter plasmid pCSFLW [57], and p8.91 gag-pol (Gag-Pol  
 135 expression plasmid [60, 61]). Plates were incubated at 37°C, 5% CO<sub>2</sub>. For transfection of low pathogenicity  
 136 avian influenza (LPAI) and other subtypes with a monobasic cleavage site, an additional plasmid expressing  
 137 either type II Transmembrane Protease Serine 2 (TMPRSS2) [65], type II Transmembrane Protease Serine 4  
 138 (TMPRSS4) [66], or human airway trypsin-like protease (HAT) [65], was also included. For the H18 subtype,  
 139 50 ng of A/flat-faced bat/Peru/033/2010/N11 in pEVAC was also included. Amounts of plasmid DNA and  
 140 reagents used for transfection in a single well of a 6-well plate are indicated in **Table 1**. All plasmid DNA  
 141 were combined in OptiMEM and FuGENE<sup>®</sup> HD added dropwise followed by incubation for 15 minutes. The  
 142 plasmid DNA-OptiMEM mixture was then added to the cells with constant swirling. At least 8 hours  
 143 post-transfection, 1 unit of exogenous Neuraminidase (Sigma N2876) was added to the 6 well-plates, with the  
 144 exception of the H18 subtype. Forty-eight hours post-transfection, supernatants were collected, passed  
 145 through a 0.45  $\mu$ m filter and stored at -80°C.

146 **Table 1.** Amounts of Influenza HA transfection components.

| Solutions/Plasmids        | Amount                                  |
|---------------------------|-----------------------------------------|
| OptiMEM                   | 100 $\mu$ L                             |
| p8.91                     | 250 ng                                  |
| pCSFLW                    | 375 ng                                  |
| HA in pEVAC               | 10 ng (50 ng for H18)                   |
| HA in pl.18               | 50 – 500 ng                             |
| HA in phCMV1              | 50 – 500 ng                             |
| Protease-encoding plasmid | 2.5 – 500 ng                            |
| FuGENE <sup>®</sup> HD    | 3 $\mu$ L per $\mu$ g total plasmid DNA |

## 147 2.4. Influenza pseudotype titration

148 Titration experiments were performed in Nunc F96 MicroWell white opaque polystyrene plates (Thermo  
 149 Fisher Scientific 136101). The pseudotype production titer was evaluated by transducing HEK293T/17 cells  
 150 (or MDCKII cells for H17 and H18) with the PV. Fifty microliters of viral supernatant were serially diluted

151 two-fold across a 96-well plate in duplicate before adding 50  $\mu$ L of  $1 \times 10^4$  HEK293T/17 cells to each well.  
 152 Control wells in which there was no PV added were also present on each plate as an indirect cell viability  
 153 measurement. Plates were then incubated at 37°C, 5% CO<sub>2</sub> for 48 hours. Media was removed and 25  $\mu$ L  
 154 Bright-Glo® luciferase assay substrate was added to each well. Titration plates were then read using the  
 155 GloMax® Navigator (Promega) using the Promega GloMax® Luminescence Quick-Read protocol. Viral  
 156 pseudotype titer was then determined in Relative Luminescence Units/mL (RLU/mL).

## 157 2.5. Reference antisera and bat surveillance sera

158 Reference antisera to assess the neutralization sensitivity of representative IAV and IBV pseudotypes  
 159 from our library was obtained from the OIE (World Organisation for Animal Health), the National Institute for  
 160 Biological Standards and Control (NIBSC) or the Animal and Plant Health Agency (APHA). Antisera were  
 161 generated by immunizing chickens (OIE) and sheep (NIBSC) with HA antigen. At the time of publication,  
 162 reference antiserum for H17 was not available, however, Fugivorous bat sera, collected as part of a bat sera  
 163 surveillance program in Nigeria, was provided by APHA.

164 **Table 2.** Details of reference antisera obtained from OIE, NIBSC and APHA for strains of IAV (H1-16) and IBV  
 165 (B/Yam and B/Vic).

| HA Subtype | Antiserum Strain                       | Source |
|------------|----------------------------------------|--------|
| H1         | A/duck/Italy/447/2005 (H1)             | OIE    |
| H2         | A/duck/Germany/1215/1973 (H2)          | OIE    |
| H3         | A/psittacine/Italy/2873/2000 (H3)      | OIE    |
| H4         | A/cockatoo/England/1972 (H4)           | OIE    |
| H5         | A/chicken/Scotland/1959 (H5)           | APHA   |
| H6         | A/turkey/Canada/1965 (H6)              | OIE    |
| H7         | A/Anhui/1/2013 (H7)                    | NIBSC  |
| H8         | A/turkey/Ontario/6118/1968 (H8)        | OIE    |
| H9         | A/mallard/Italy/3817-34/2005 (H9)      | OIE    |
| H10        | A/ostrich/South Africa/2001 (H10)      | OIE    |
| H11        | A/duck/Memphis/546/1974 (H11)          | OIE    |
| H12        | A/duck/Alberta/60/1976 (H12)           | OIE    |
| H13        | A/gull/Maryland/704/1977 (H13)         | OIE    |
| H14        | A/mallard/Gurjev/263/1982 (H14)        | OIE    |
| H15        | A/shearwater/Australia/2576/1979 (H15) | OIE    |
| H16        | A/gull/Denmark/68110/2002 (H16)        | OIE    |
| H17        | Polyclonal sera (BATS)                 | APHA   |
| B/YAM      | B/Phuket/3073/2013                     | NIBSC  |
| B/VIC      | B/Brisbane/60/2008                     | NIBSC  |

## 166 2.6. Mouse immunogenicity studies

167  
 168

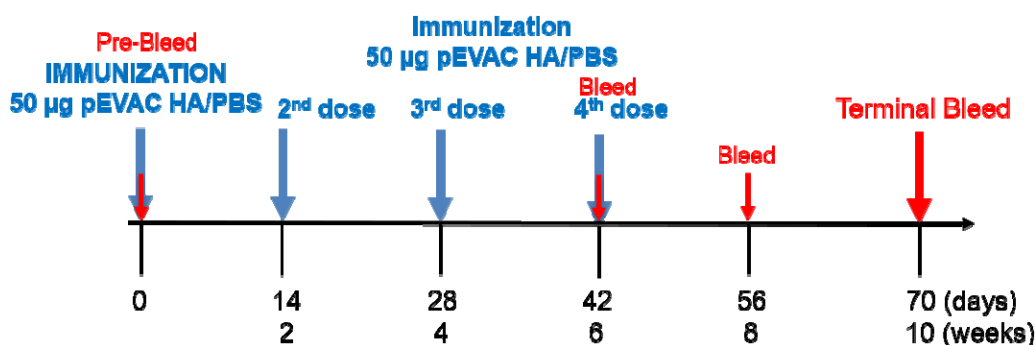

169  
 170  
 171 **Figure 1.** Study schedule of immunization with pEVAC HA antigens. Mice received either pEVAC HA antigens  
 172 or PBS (negative control groups) on weeks 0, 2, 4, and 6 via subcutaneous rear flank injection. Blood was  
 173 collected on weeks 6, 8, and 10.

175 For mouse immunogenicity studies, 6-8 week old female BALB/c mice were obtained from Charles River  
176 Laboratories and housed at University Biomedical Services, University of Cambridge. Mice were divided  
177 into groups of six for each individual vaccination antigen. On day 0, mice were injected subcutaneously (SC)  
178 on the rear flank with a 50  $\mu$ L volume of 50  $\mu$ g pEVAC HA, produced using the EndoFree Plasmid Mega Kit  
179 (Qiagen), or PBS for negative control groups. Immunizations were repeated on weeks 2, 4, and, 6 (**Figure 1**).  
180 Mice were weighed daily and monitored for any signs of disease or distress. Mice were bled at 42 days post  
181 immunization (dpi), 56 dpi, and 70 dpi (**Figure 1**). 70 days post immunization, all mice were culled and ter-  
182 minal bleeds collected. Collected blood was left to clot for 1 hour at room temperature and serum was  
183 separated via centrifugation at 2,000xg for 10 minutes at 4°C and stored at -20°C.

#### 184 2.7. Pseudotype microneutralization (pMN) assay

185 We performed pseudotype microneutralization assays using standard reference antisera, monoclonal  
186 antibodies (mAb), and serum samples from animal studies. Monoclonal antibody concentrations used were  
187 in the range of 0.5 ng/mL - 1000 ng/mL and serum and antiserum samples were initially diluted 1:20 or 1:50 in  
188 50  $\mu$ L complete DMEM, before being serially diluted two-fold across a 96-well plate. Fifty microliters of PV at  
189 a concentration of  $1.0 \times 10^6$  RLU/well as determined via titration was then added to the mAb or serum dilutions,  
190 making the final dilution of sera 1:40 or 1:100. This mixture was incubated for 1 hour at 37°C, 5% CO<sub>2</sub>.  
191 Afterwards, 50  $\mu$ L of  $1.5 \times 10^4$  HEK293T/17 cells were added to each well. PV only (equivalent to 0% neu-  
192 tralization) and cell only controls with no virus (equivalent to 100% neutralization control) were also included  
193 in the test plate. Plates were incubated for 48 hours at 37°C and 5% CO<sub>2</sub>. Media was removed and 25 $\mu$ L  
194 Bright-Glo® luciferase assay substrate added to each well. Plates were then read using the GloMax® Nav-  
195 igator (ProMega) using the Promega GloMax® Luminiscence Quick-Read protocol. Half-maximal inhibitory  
196 dilution or concentration (IC<sub>50</sub>) values were calculated using GraphPad Prism 8.12. A detailed analysis is  
197 described in Ferrara, 2018 [67].

#### 198 2.8. Statistical analysis

199 All statistical analyses were performed with GraphPad Prism 8.12 for Windows (GraphPad Software).  
200 The Kruskal-Wallis H test, a rank-based nonparametric test, was used to determine if there were statistically  
201 significant differences between two or more groups in comparison to a control group.

#### 202 2.9. Bioinformatic analysis

203 HA sequences for both IAV and IBV were downloaded from the Influenza Virus Resource database  
204 (IVRD) (fludb.org). Phylogenetic tree was generated using the Cyber-Infrastructure for Phylogenetic RE-  
205 Search (CIPRES) Gateway [68]. The resulting tree file was then visualized using the Archaeopteryx tree  
206 viewer in the Influenza Resource Database (IRD) [69].  
207

### 208 3. Results

#### 209 3.1. Production of IAV and IBV Pseudotype library

210 The influenza pseudotype viruses (PV) described herein were constructed using the transfection method  
211 detailed above (Section 2.3). All PV were produced with the following 3 plasmids: i) a plasmid containing  
212 packaging genes from a surrogate lentivirus (HIV) (gag-pol) which is defective for native HIV envelope, ii) a  
213 plasmid expressing the HA envelope of the strain being studied (IAV or IBV), and iii) a transfer plasmid ex-  
214 pressing firefly luciferase reporter (**Figure 2a**). 1 unit of exogenous neuraminidase (exoNA) was added per  
215 well to facilitate viral egress, with the PV containing the HA envelope on its surface, harvested in cell su-  
216 pernatants.

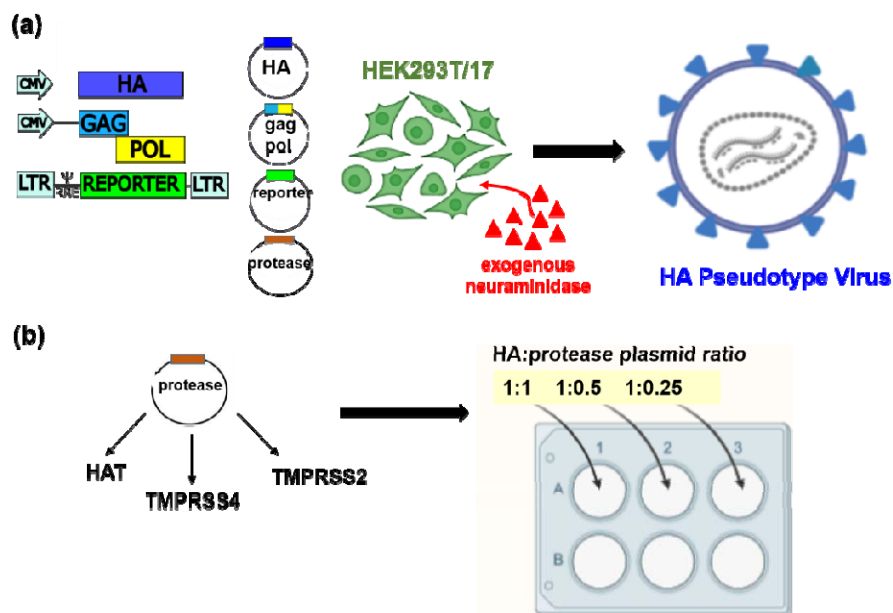

217

218 **Figure 2.** Schematic representation of the production of influenza HA pseudotypes by plasmid transfection. **(a)**  
219 Using the 3 or 4 plasmid system, exogenous NA was added to the transfected cultures at least 8 hours  
220 post-transfection. **(b)** Addition of protease, which is necessary for production of low pathogenic influenza A  
221 viruses (LPAI) and subtypes with a monobasic cleavage site, and IBV, were optimized to increase titers by  
222 transfecting in a ‘checkerboard’ approach with different proteases (e.g. HAT, TMPRSS4 & TMPRSS2).  
223 Protease plasmid was added at a ratio of 1:1, 1:0.5 and 1:0.25 to HA plasmid DNA for rapid optimization in a 6  
224 well plate format. All pseudotypes were harvested after 48 hours in culture. Image created in BioRender.

225 IAV and IBV strains which contain monobasic cleavage sites require the presence of a trypsin-like pro-  
226 tease *in vitro* to catalyze HA proteolytic cleavage from the inactive trimeric HA0 to the active HA1 and HA2  
227 leading to viral membrane fusion [70-72]. As demonstrated previously, an additional plasmid expressing a  
228 trypsin-like protease was required for PV production (**Figure 2a**) [58, 65, 66], with the amount of protease  
229 plasmid DNA requiring optimization for each PV produced. We found that this is dependent on the HA  
230 subtype and occasionally the strain being produced (**Figure 3, Table 3**). Optimization was achieved using a  
231 6-well plate checkerboard system for protease amounts (**Figure 2b**), and a fixed amount of all other plasmids  
232 was used to transfect 293T/17 cells. For all strains except HPAI strains, initial transfections were under-  
233 taken with human airway trypsin-like protease (HAT) in the top 3 wells and Transmembrane Serine Protease  
234 4 (TMPRSS 4) in the bottom 3 wells of the 6-well plate. Protease plasmid was added at a ratio to the HA  
235 plasmid (**Figure 2b**), i.e., for every 10 ng of HA, we tested with 10 ng, 5 ng, and 2.5 ng protease DNA. All PV  
236 produced were titrated and PV titer determined in RLU (**Figure 3**).

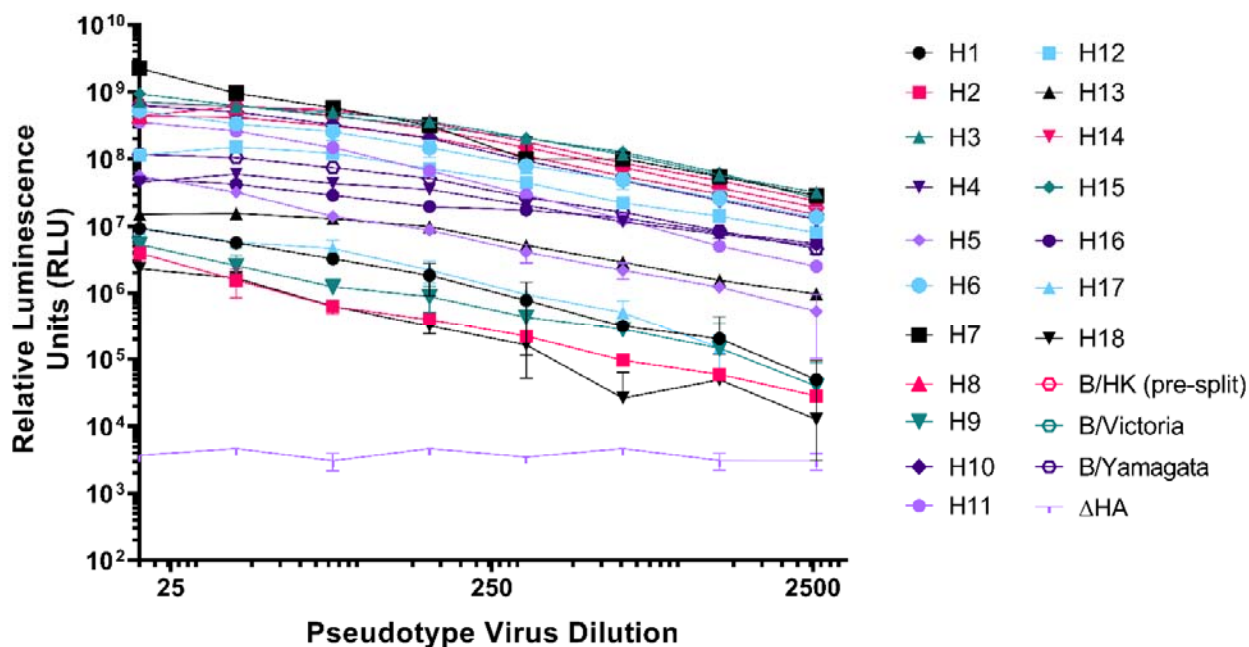

237  
 238 **Figure 3.** Titration of representative Influenza A (H1-H18) and influenza B (pre-split, B/Victoria-like and  
 239 B/Yamagata-like lineages) viruses. Pseudotyped lentiviral particles with HA envelopes: H1 –  
 240 A/England/195/2009(H1), H2 – A/quail/Rhode Island/16-0186222-1/2016(H2), H3 – A/ruddy turn-  
 241 stone/Delaware Bay/606/2017(H3), H4 – A/green-winged teal/California/K218/2005(H4), H5 –  
 242 A/gyrfalcon/Washington/41088-6/2014(H5), H6 – A/American wigeon/California/HS007A/2015(H6), H7 –  
 243 A/Shanghai/2/2013(H7), H8 – A/mallard/Netherlands/7/2015(H8), H9 – A/chicken/Israel/291417/2017(H9),  
 244 H10 – A/duck/Bangladesh/24268/2015(H10), H11 – A/red shoveler/Chile/C14653/2016(H11), H12 –  
 245 A/northern shoveler/Nevada/D1516557/2015(H12), H13 – A/laughing gull/New Jersey/UGA17-2843/2017(H13),  
 246 H14 – A/mallard/Astrakhan/263/1982(H14), H15 –  
 247 A/duck/Bangladesh/24697/2015(H15), H16 – A/black-headed gull/Netherlands/1/2016(H16), pre-split –  
 248 B/Hong Kong/8/1973, B/Victoria – B/Brisbane/60/2008, and B/Yamagata – B/Phuket/3073/2013, were titrated  
 249 in HEK293T/17 cells. H17 – A/little yellow-shouldered bat/Guatemala/60/2017(H17), and H18 – A/flat-faced  
 250 bat/Peru/33/2010(H18) were titrated in MDCKII cells. ΔHA is included as a no envelope control. Each point  
 251 represents the mean and standard deviation of two replicates per dilution. Readout is expressed in relative  
 252 luminescence units (RLU).

253  
 254 If production titers were less than  $5 \times 10^7$  RLU/mL, we additionally tested with Transmembrane Serine  
 255 Protease 2 (TMPRSS2) for the PV strain in the same plasmid ratios (**Figure 2b**). Generally, TMPRSS4  
 256 produced the highest titers (RLU/mL) for all subtypes except for H17 and IBV lineages, where HAT produced  
 257 the highest titers and H2, H3, and H4 required TMPRSS2 [73] for optimal production (**Table 3**). Protease  
 258 was not necessary for production of HPAI representative viruses, H5 and H7 in **Figure 3** and **Table 2** (as  
 259 indicated by \*). Optimized conditions were then recorded, and PV production volume was scaled up to  
 260 produce larger PV stocks.  
 261  
 262  
 263  
 264  
 265  
 266  
 267  
 268  
 269  
 270  
 271

272 **Table 3.** Titers in relative luminescence units/mL (RLU/mL) of IAV and IBV hemagglutinin pseudotyped vi-  
 273 ruses as indicated in **Figure 3**. Protease utilized to achieve the highest titers is indicated. TMPRSS4 is  
 274 abbreviated to T4 and TMPRSS2 to T2.

| <b>Group I IAV HA</b> |                       |                 | <b>Group II IAV HA</b> |                       |                 |
|-----------------------|-----------------------|-----------------|------------------------|-----------------------|-----------------|
| <b>HA Envelope</b>    | <b>Titer (RLU/mL)</b> | <b>Protease</b> | <b>HA Envelope</b>     | <b>Titer (RLU/mL)</b> | <b>Protease</b> |
| H1                    | 2.25E+08              | T4              | H3                     | 5.39E+10              | T2              |
| H2                    | 6.62E+07              | T2              | H4                     | 6.62E+07              | T2              |
| H5                    | 1.32E+09              | *               | H7                     | 5.25E+10              | *               |
| H6                    | 2.35E+10              | T4              | H6                     | 2.35E+10              | T4              |
| H8                    | 4.75E+10              | T4              | H10                    | 2.68E+10              | T4              |
| H9                    | 4.88E+08              | T4              | H14                    | 2.92E+10              | T4              |
| H11                   | 8.78E+09              | T4              | H15                    | 5.16E+10              | T4              |
| H12                   | 1.21E+10              | T4              |                        |                       |                 |
| H13                   | 1.44E+09              | T4              | <b>IBV HA</b>          |                       |                 |
| H16                   | 5.81E+09              | T4              | <b>B pre-split</b>     | 3.87E+10              | HAT             |
| H17                   | 2.94E+08              | HAT             | <b>B/Vic-like</b>      | 2.89E+10              | HAT             |
| H18                   | 5.33E+07              | T4              | <b>B/Yam-like</b>      | 1.78E+09              | HAT             |

(\*) indicates highly pathogenic avian influenza (HPAI) strains which did not require protease for production

277  
 278 Our optimized method enabled us to produce the most comprehensive pseudotype library to date with  
 279 representative strains from IAV subtypes H1-H18 and both IBV lineages. **Figure 4** illustrates the range of IAV  
 280 subtypes already present and available in this library. Full details of current library at the VPU are indicated  
 281 in **Supplementary Table 1**. These include low pathogenic avian influenza (LPAI) strains from H5 and H7, in  
 282 addition to HPAI H5 and H7 presented (**Figure 3, Table 3**).

283



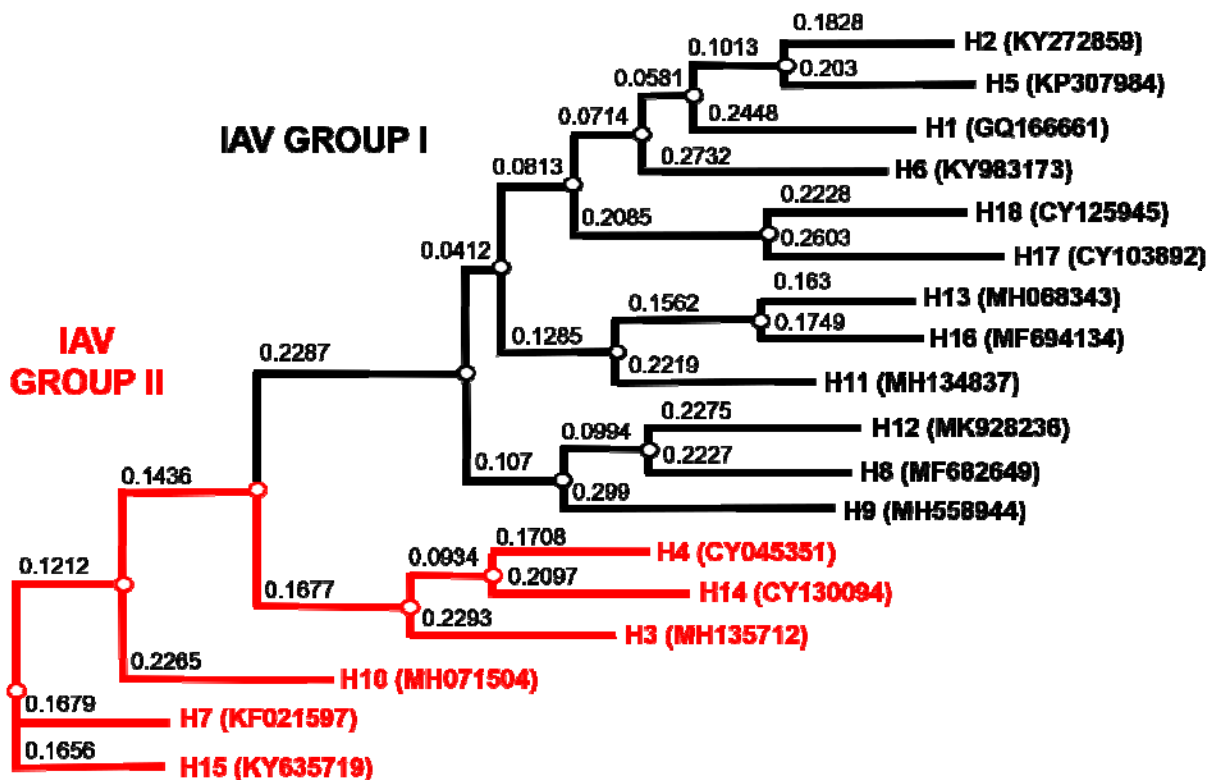

284  
285  
286  
287  
288  
289  
290  
291  
292

**Figure 4.** Phylogenetic tree of representative IAV HA from the PV library constructed as shown in **Figure 3** and **Table 3**. Influenza A Group I HA PV are shown in black, IAV Group II PV in red. Accession numbers are reported with the subtype on the tree tips. Nodes are shown at the ends of branches which represent sequences or hypothetical sequences at various points in evolutionary history. Branch lengths indicate the extent of genetic change. The tree generated was constructed with PhyML on the Influenza Research Database (IRD) [69] and graphically elaborated with Archaeopteryx.js (<https://sites.google.com/site/cmzmasek/home/software/archaeopteryx-js>).

293

### 294 3.2. Neutralization of pseudotypes by reference antisera

295 The neutralization susceptibility of representative PV generated to available HA subtype specific refer-  
296 ence antisera (**Table 2**) was assessed. All reference antisera were able to neutralize subtype homologous  
297 PV they were tested against (**Figure 5**). We have shown neutralization dose response curves for PV rep-  
298 resenting IAV strains which have been reported as the cause of human disease, including avian subtypes  
299 that have caused zoonotic infection without being associated with sustained human to human transmission  
300 (HPAI H5 and H7, and H9) (**Figure 5a**). We have also tested against HA PV that have been associated with  
301 swine and human infection, H1 strains which have been found in pigs, which may acquire the ability to  
302 transmit to humans due to possible antigenic shift (**Figure 5b**), and avian IAV subtypes which are found in  
303 their natural reservoir, wild, and occasionally domesticated, birds (**Figure 5c**) and may evolve in future to  
304 novel pandemic strains in humans. Currently there is no commercially available H17 or H18 subtype anti-  
305 sera. Due to the association of H17 in frugivorous bat species, sera collected from bats in Nigeria, as pro-  
306 vided by the Animal and Plant Health Agency (APHA), were assessed against the H17 pseudotype (**Figure**  
307 **5d**). Three bats within a larger panel (only 5 samples shown here) neutralized the H17 PV (**Figure**  
308 **5d**). Human IBV PV from both Yamagata and Victoria-like lineages were also susceptible to neutralization  
309 from reference antisera (**Figure 5e**). Antisera to pre-split IBV strains were not available for this study,  
310 nonetheless, our representative pre-split IBV (B/Hong Kong/73) strain was neutralized by both anti-  
311 anti-Yamagata and anti-Victoria reference sera. However, this PV was more susceptible to neutralization by  
312 antisera generated using HA from the Victoria-like lineage than the Yamagata-like lineage (**Figure 5e**), with  
313  $IC_{50}$  dilution values of 688.8 and >10,000, respectively.

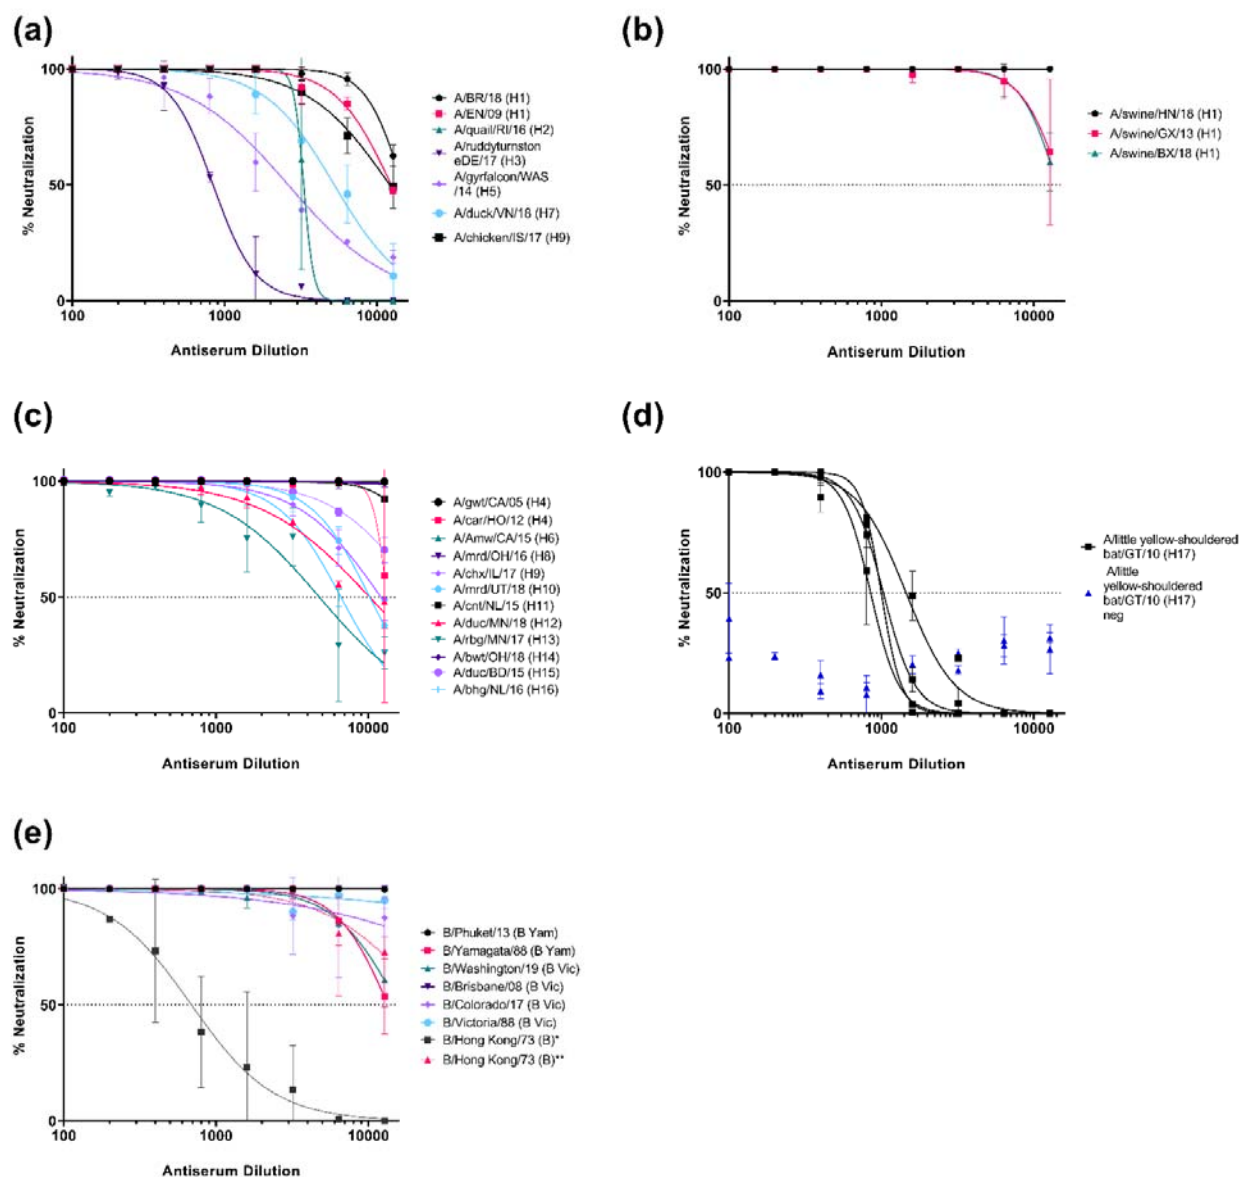

314  
 315 **Figure 5.** Neutralization of influenza pseudotypes by reference antisera and bat sera from influenza surveillance.  
 316 (a) Neutralization of representative IAV subtypes which have previously caused infection in humans  
 317 (H1, H2, H3, H5, H7, and H9). (b) Neutralization of pseudotypes representing IAV isolated from swine  
 318 (H1). (c) Neutralization of pseudotypes which are representative of IAV found in avian populations (H4, H6,  
 319 H8, H9, H10, H11, H12, H13, H14, H15 and H16). (d) Neutralization of H17 PV (A/little yellow-shouldered  
 320 bat/Guatemala/060/2010) by bat sera from bat surveillance sampling in Nigeria as provided by APHA.  
 321 (e) Neutralization of IBV pseudotypes which have caused human infection (B/Yamagata-like and  
 322 B/Victoria-like viruses and pre-split IBV). As pre-split antiserum was not available, neutralization susceptibility  
 323 of this PV to B/Yamagata lineage antisera (\*) and B/Victoria lineage antisera (\*\*) have been shown.  
 324 Neutralization was measured by a luciferase reporter assay. Reference antisera and bat sera were serially  
 325 diluted two-fold from a starting dilution of 1:100.  $1.0 \times 10^6$  RLU of PV was then added to each well. For all  
 326 plots, each point represents the mean and standard deviation of two replicates per dilution. Details of reference  
 327 antisera are indicated in **Table 2**.

### 328 3.3. Mouse immunogenicity studies

329 We have conducted preliminary mouse immunogenicity studies to determine the capacity of potential  
 330 selected HA vaccine candidates to elicit a measurable immune response, assess safety, and to see if our  
 331 dose and dosing regimen could inform future pre-clinical trials for protection and efficacy. In this study, we

332 have measured immune responses to vaccination in mouse sera (humoral immune responses). The  
333 humoral immune response is assessed from the post-vaccination appearance of antibody directed at the  
334 specific vaccine antigen at appointed time points. Using our PV library, we have measured functional anti-  
335 bodies in mouse sera that can be applied to many samples in low containment, which would not be possible  
336 using wildtype viruses.

337 We first determined if our dose of 50  $\mu$ g pEVAC HA DNA could generate an immune response that could  
338 be monitored across a certain time frame, and if additional immunizations could increase this specific immune  
339 response. It should be noted that all mice used for our experiments were naïve and have not had prior  
340 exposure to influenza, hence it is assumed that neutralization of PV will be due to the immune response  
341 generated by immunization with influenza antigens.

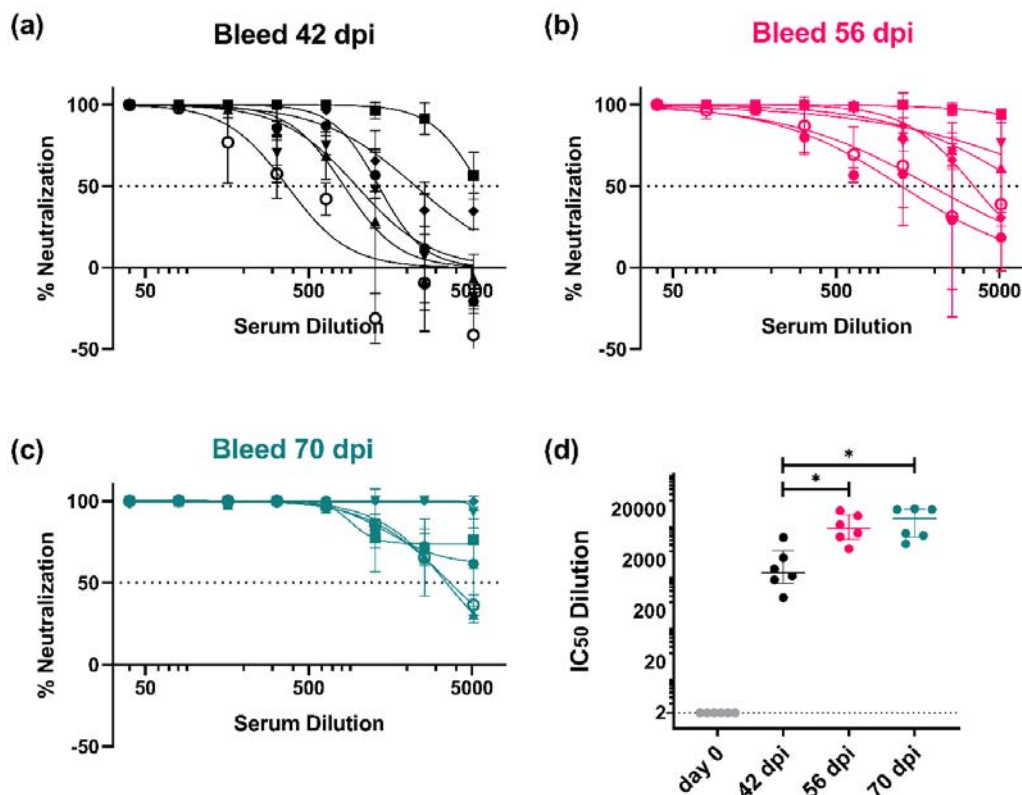

342  
343 **Figure 6.** *In vitro* neutralizing activity of mouse sera against A/England/195/09 (H1) (EN/09) as monitored at  
344 specific timepoints during the immunization protocol. Mice were vaccinated with 50  $\mu$ g pEVAC – EN/09 (H1)  
345 on days 0, 14, 28, and 42. Bleeds were taken (a) 42 days post immunization (dpi), (b) 56 dpi, and (c) 70 dpi  
346 (terminal bleed). Neutralizing activity was tested against  $1 \times 10^6$  RLU of A/England/195/09 (H1) PV. (d)  
347 Comparison of half maximal inhibitory dilutions (IC<sub>50</sub>) in post-vaccination samples as a function of time is  
348 shown in brackets (\* $p < 0.05$ ). Broken line shows an assigned baseline level of 2 indicating 0% neutralization.  
349 For plots (a-c), the mean and standard deviation of individual mouse serum samples are shown (n=6). Plot  
350 (d) shows the median and interquartile range of samples tested.

351 We observed an immune response in all mice (n=6) vaccinated with pEVAC EN/09 (H1) against the  
352 corresponding homologous EN/09 (H1) PV in all post-vaccination samples from the earliest time of sampling  
353 (42 dpi) as compared to pre-vaccinated sera (day 0) (Figure 6). At 42 dpi, mice had received 3 immuniza-  
354 tions (day 0, day 14, and day 28) and had already developed neutralizing antibody responses compared to  
355 day 0 (Figure 6a). At 56 and 70 dpi, mice had received 4 immunizations (day 0, day 14, day 28, and day 42)  
356 (Figure 6b-c). A significant increase in detectable neutralizing antibodies can be seen between the third  
357 and fourth round of immunizations (Figure 6d) demonstrating that boosting the immune response with  
358 subsequent immunizations may give rise to stronger neutralizing titers. There was no significant difference  
359 between neutralizing activity of mouse sera from bleeds taken at 56 and 70 dpi (Figure 6d), suggesting that  
360 we had employed an ideal number and interval of immunizations of pEVAC HA to achieve optimal  
361 strain-specific titers in mice.

362 The ability of mouse sera vaccinated with a specific IAV strain to neutralize strains of the same subtype  
 363 was then evaluated. This was to assess possible strain cross-reactivity of the immune responses elicited by  
 364 vaccination to these PV. This is especially important for influenza, which is subject to continuous random  
 365 antigenic drift and wherein viruses of the same subtype may belong to different clades. Given this, we chose  
 366 to investigate H1, the most recent IAV pandemic strain (in 2009), and HPAI subtypes H5 and H7, which have  
 367 caused human spillovers from fatal poultry outbreaks in the past. We employed the same immunization  
 368 procedure as detailed above and terminal bleeds were assessed for neutralizing activity.

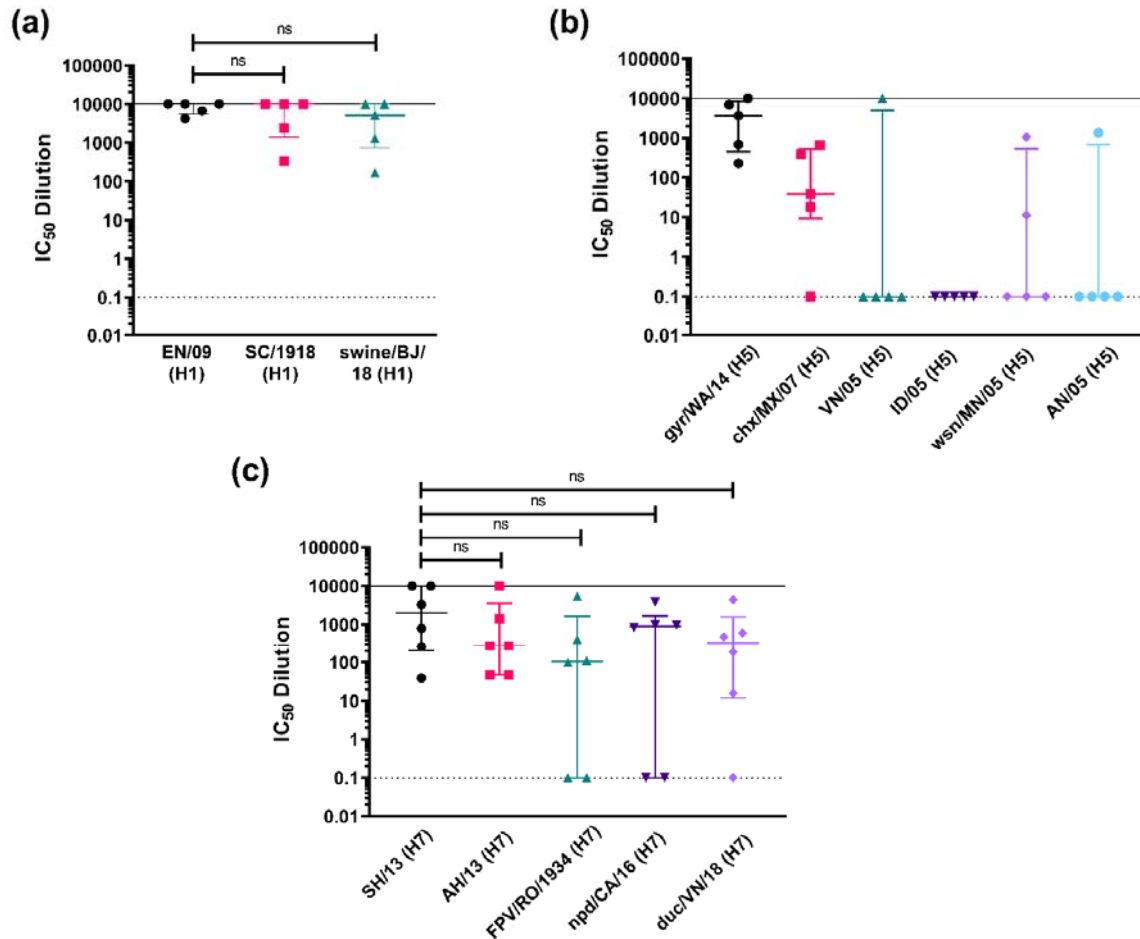

369  
 370 **Figure 7.** *In vitro* neutralizing activity as shown by  $IC_{50}$  dilution of mouse sera vaccinated with an HA subtype  
 371 tested against homologous PV and representative PV strains of the same subtype. (a) Mice were vac-  
 372 cinated with 50  $\mu$ g pEVAC HA A/England/195/09 (H1) (EN/09) (n=5). Terminal bleeds (70 dpi) were tested  
 373 against H1 PV strains (x-axis): homologous EN/09, A/South Carolina/1/1918 (H1) (SC/1918) and  
 374 A/swine/Beijing/301/18 (H1) (swine/BJ/18). (b) Mice were vaccinated with 50  $\mu$ g pEVAC HA  
 375 A/gyrfalcon/Washington/41088-6/14 (H5) (gyr/WA/14) (n=5). Terminal bleeds (70 dpi) were tested against  
 376 H5 PV strains (x-axis): homologous gyr/WA/14, A/chicken/Mexico/7/07 (H5) (chx/MX/07), A/Indonesia/5/05  
 377 (H5) (ID/05), A/Vietnam/1203/04 (H5) (VN/05), A/whooper swan/Mongolia/244/05 (H5) (wsn/MN/05), and  
 378 A/Anhui/1/05 (H5) (AN/05). (c) Mice were vaccinated with 50  $\mu$ g pEVAC HA A/Shanghai/2/13 (H7) (SH/13)  
 379 (n=6). Terminal bleeds (70 dpi) were tested against H7 PV strains (x-axis): homologous SH/13, A/Anhui/1/13  
 380 (H7) (AH/13), A/FPV/Rostock/1934 (H7) (FPV/RO/1934), A/northern pintail duck/California/UCD1582/16 (H7)  
 381 (npd/CA/16), and A/duck/Vietnam/HU10-64/18 (H7) (duc/VN/18). For all plots, the median and interquartile  
 382 range of individual mouse serum samples per immunization group are shown. Solid line indicates an assigned  
 383 baseline maximum  $IC_{50}$  dilution of 10,000 showing 100% neutralization and broken line shows an assigned  
 384 baseline level of 0.1 indicating 0% neutralization (cell only mean). Comparisons of no significant difference  
 385 (ns:  $p > 0.05$ ) against the homologous PV are shown in brackets.

386 For our A/H1 panel, we immunized mice with the pandemic strain EN/09 (H1) (**Figure 7a**). We tested  
 387 against a previous H1 pandemic strain, SC/1918 (Spanish flu) and a possible emerging pandemic strain,  
 388 swine/BJ/18, guided by the knowledge that the last H1N1 pandemic (swine flu) was caused by a quadruple-reassortant virus, containing genes from Asian and European swine, North American avian as well as  
 389 human influenza virus [30]. Terminal sera from mice immunized with EN/09 were able to neutralize all H1 PV  
 390 tested, with no significant difference observed in neutralization activity against homologous and heterologous  
 391 strains of the same subtype, with representative PV strains covering 100 years, from 1918 to 2018 (**Figure**  
 392 **7a**).  
 393

394 We immunized mice with gyr/WA/15 (H5) for our A/H5 panel (**Figure 7b**). We tested across six different  
 395 clades, gyr/WA/14 (clade 2.3.4.4c), chx/MX/07 (American non-goose Guangdong), ID/05 (clade 2.1.3.2),  
 396 VN/04 (clade 1), wsn/MN/05 (clade 2.2), and AN/05 (clade 2.3.4). HPAI H5 strains have been known to  
 397 cause deadly outbreaks in poultry with some human spillover in the past [74, 75]. H5 viruses especially  
 398 those in clade 2 are known to evolve rapidly and extensively, with newly emerging strains circulating in many  
 399 regions of the world [74]. Our findings here demonstrate that terminal sera from mice immunized with  
 400 gyr/WA/15 (H5) were unable to neutralize the other H5 PV tested as effectively as the homologous strain  
 401 used for vaccination (**Figure 7b**). Interestingly, one mouse developed a broadly neutralizing response and  
 402 was able to neutralize all PV tested except for IN/05 but all other samples revealed no H5 cross-strain neu-  
 403 tralizing immune response (**Figure 7b**).

404 Mice were immunized with SH/13 (H7) for the H7 panel (**Figure 7c**). In addition to the homologous  
 405 SH/13 (H7) PV, we tested against four other H7 strains, FPV/RO/1934, the historical H7 fowl plague virus of  
 406 1934, a human IAV PV, AH/13, and two avian PV, npd/CA/16, and duc/VN/18. Terminal sera from mice  
 407 immunized with SH/13 were able to neutralize all H7 PV tested, with no significant difference observed in the  
 408 means of the IC<sub>50</sub> dilution values obtained against homologous and heterologous strains of the same subtype  
 409 (**Figure 7c**). Some serum samples were unable to neutralize all three H7 avian PV, but all serum terminal  
 410 bleeds were effective against the other H7 human PV tested, AH/13, with neutralization of the homologous  
 411 strain showing the same pattern (**Figure 7c**).

412 We then examined the breadth of responses within a subtype with the idea that one vaccination could  
 413 protect for small changes caused by antigenic drift as well as providing some initial protection from  
 414 reassortant viruses which can transmit between species. This is also the basis of strain selection for sea-  
 415 sonal influenza vaccination [54, 76]. To test this, we examined cross strain neutralization in mice vaccinated  
 416 with antigens from strains of IAV H3 isolated from human and avian origins. H3 circulates in the human  
 417 population and is a component of the quadrivalent influenza vaccine, transmission is often from animal  
 418 sources [6, 7], and therefore cross-reactive immune responses would be beneficial.

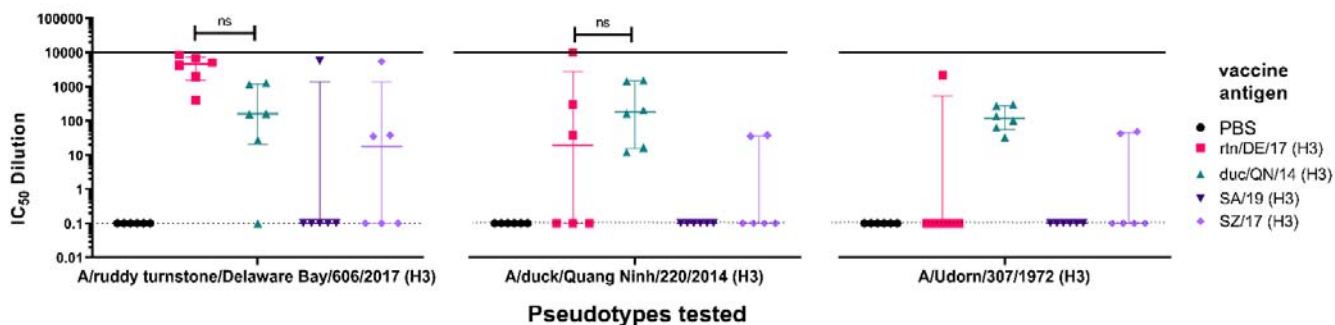

419  
 420 **Figure 8.** *In vitro* neutralizing activity as shown by IC<sub>50</sub> dilution of mouse sera vaccinated with avian and human  
 421 pEVAC H3 vaccine antigens tested against homologous avian H3 PV and a representative human PV strain of  
 422 H3. Four groups consisting of 6 mice each (n=6/group) were vaccinated with 50 µg pEVAC HA-A/ruddy  
 423 turnstone/Delaware Bay/606/2017 (H3) (rtn/DE/17) (pink square) or HA-A/duck/Quang Ninh/220/2014 (H3)  
 424 (duc/QN/14) (green triangle), HA-A/South Australia/34/2019 (H3) (SA/19) (violet inverted triangle), and  
 425 HA-A/Switzerland/8060/2017 (H3) (SZ/17) (purple diamond), respectively. An additional group of mice was  
 426 vaccinated with PBS (negative control group) (n=6). Terminal bleeds (70 dpi) were tested against H3 PV  
 427 strains: 2 homologous avian PV, rtn/DE/17 and duc/QN/14, and one human PV, A/Udom/307/1972 (UD/1972),  
 428 as shown in the x axes. For all plots, the median and interquartile range of individual mouse serum samples  
 429 per immunization group are shown. Solid line indicates an assigned maximum IC<sub>50</sub> dilution of 10,000 showing  
 430 100% neutralization and broken line shows an assigned baseline level of 0.1 indicating 0% neutralization (cell  
 431 only mean). Comparisons of no significant difference (ns: p>0.05) against the homologous PV are shown in  
 432 brackets.

433 We immunized groups of mice with H3 from avian strains, A/ruddy turnstone/ Delaware Bay/606/2017  
434 (H3) (rtn/DE/17) and A/duck/Quang Ninh/220/2014 (H3) (duc/QN/14), and 2 strains of H3 of clades 3C.2a2  
435 which have circulated recently in the human population, A/South Australia/34/2019 (H3) (SA/19) and  
436 A/Switzerland/8060/2017 (H3) (SZ/17), respectively (**Figure 8**). Terminal sera from mice were tested  
437 against two avian H3 PV matched to the immunization antigens, rtn/DE/17 and duc/QN/14, and one repre-  
438 sentative human strain PV, A/Udorn/307/1972 (H3).

439 Terminal sera from mice immunized with rtn/DE/17 (**Figure 8, 1<sup>st</sup> panel**) were able to strongly neutralize  
440 homologous PV (rtn/DE/17) with an IC<sub>50</sub> dilution range of 413-8634. These mice were also able to neutralize  
441 heterologous PV duc/QN/14 with no significant difference compared to sera from mice vaccinated with  
442 duc/QN/14 antigen (**Figure 8, 2<sup>nd</sup> panel**). Only one mouse from the group vaccinated with rtn/DE/17 pro-  
443 duced responses which were able to neutralize human H3 PV, A/Udorn/307/1972 (**Figure 8, 3<sup>rd</sup> panel**),  
444 whereas, all mice vaccinated with duc/QN/14 were able to neutralize A/Udorn/307/1972. This is promising as  
445 vaccination with an avian H3 has shown neutralization of a human H3 PV, albeit an older strain from 1972.  
446 Mice immunized with SA/19, a human H3 antigen, did not neutralize any of the PV tested except for serum  
447 from one mouse which was able to neutralize PV rtn/DE/17 (IC<sub>50</sub> dilution ~5659). Sera from half of the mice  
448 immunized with SZ/17 were able to neutralize PV rtn/DE/17 and 2 mice were able to neutralize duc/QN/14  
449 and PV A/Udorn/307/1972. These results suggest that vaccination with duc/QN/14 showed the best immune  
450 responses against all H3 PV tested, either avian or human (**Figure 8**).

451 As seen with results indicated above (**Figures 7 and 8**), vaccination with subtype specific antigens have  
452 very little effect against other strains from that same subtype. This is what is observed in seasonal vac-  
453 cination that generates subtype-specific antibodies that will have little or no efficacy against drifted strains  
454 [77, 78]. An immunization that gives rise to broadly protective humoral immunity against influenza remains a  
455 sought-after goal. With this in mind, we have attempted to demonstrate cross-subtype neutralization from  
456 immunization among IAV subtypes that are closest to each other on the phylogenetic tree for IAV (**Figure 4**)  
457 and between the two IBV lineages, B/Victoria (B/Vic) and B/Yamagata-like viruses (B/Yam).

458 For the IAV H7/H10/H15 study (**Figure 9a, 1<sup>st</sup> panel**), mice vaccinated with npd/CA/16 (H7) showed no  
459 significant difference in neutralizing activity (n.s.) with mice vaccinated with duc/VN/18 (H7) when tested  
460 against the duc/VN/18 (H7) PV. This was also observed with mice vaccinated with mrd/UT/18 (H10) and  
461 duc/BD/15 (H15) (**Figure 9a, 1<sup>st</sup> panel**). This suggests that vaccination with northern pintail duck/CA/16  
462 (H7), mrd/UT/18 (H10), and duc/BD/15 (H15) produced a similar neutralizing response to the homologous  
463 antigen against the duc/VN/18 (H7) PV *in vitro*. Mice vaccinated with the other antigens duc/BD/15 (H10)  
464 and wts/WAUS/79 (H15) showed little to no neutralization of the H7 PV, this may be partly due to this H15  
465 virus being isolated in 1979, suggesting that this avian H15 diverged between 1979 and 2018 (**Figure 9a, 1<sup>st</sup>**  
466 **panel**).

467 Results for groups tested against mrd/UT/18 (H10) PV are more clear-cut (**Figure 9a, 2<sup>nd</sup> panel**), with  
468 only groups vaccinated with H10 antigens showing neutralizing activity against the PV. There is also no  
469 significant difference between the IC<sub>50</sub> values against the mrd/UT/18 (H10) PV in the group vaccinated with  
470 the other H10, duc/BD/15, to that vaccinated with the homologous mrd/UT/18 (H10) (**Figure 9a, 2<sup>nd</sup> panel**).  
471 Here, only neutralization of PV by mice vaccinated with the same subtype is demonstrated. Looking at the  
472 phylogenetic tree (**Figure 4**), H10 resides on a different branch than H7 and H15, and therefore it was highly  
473 unlikely that cross-subtype neutralization would be observed.

474 For groups tested against duc/BD/15 (H15) PV, vaccination with the homologous antigen, the other H15  
475 antigen, wts/WAUS/79, and duck/VN/18 (H7) showed neutralizing activity (**Figure 9a, 3<sup>rd</sup> panel**). Neutral-  
476 izing activity of mice vaccinated with all other antigens tested was closer to that of the negative control group  
477 (PBS), although a few responders, located above the upper extreme quartile, were observed.

478 For the IAV H11/H13/H16 study (**Figure 9b, 1<sup>st</sup> panel**), mice vaccinated with rds/CL/16 (H11) showed no  
479 significant difference in neutralizing activity (n.s.) with mice vaccinated with cnt/NL/15 (H11) when tested  
480 against the cnt/NL/15 (H11) PV. This suggests that vaccination with rds/CL/16 (H11) produces the same  
481 neutralizing response as its homologous antigen against the cnt/NL/15 (H11) PV *in vitro*. Mice vaccinated  
482 with both H13 antigens showed very little neutralization against the H11 PV, with only two mice of the  
483 Igl/NJ/17(H13) group and one mouse from the rbg/MN/17 (H13) group showed neutralization though IC<sub>50</sub>  
484 values were closer to the negative control group (**Figure 9b, 1<sup>st</sup> panel**). There was no neutralization of the  
485 H11 PV by mice vaccinated with H16 antigens, mgl/SCA/18 (H16) and bhg/NL/16 (H16) suggesting that this  
486 antigen did not elicit significant responses to epitopes which are common to both the H11 and H16 IAV  
487 strains.

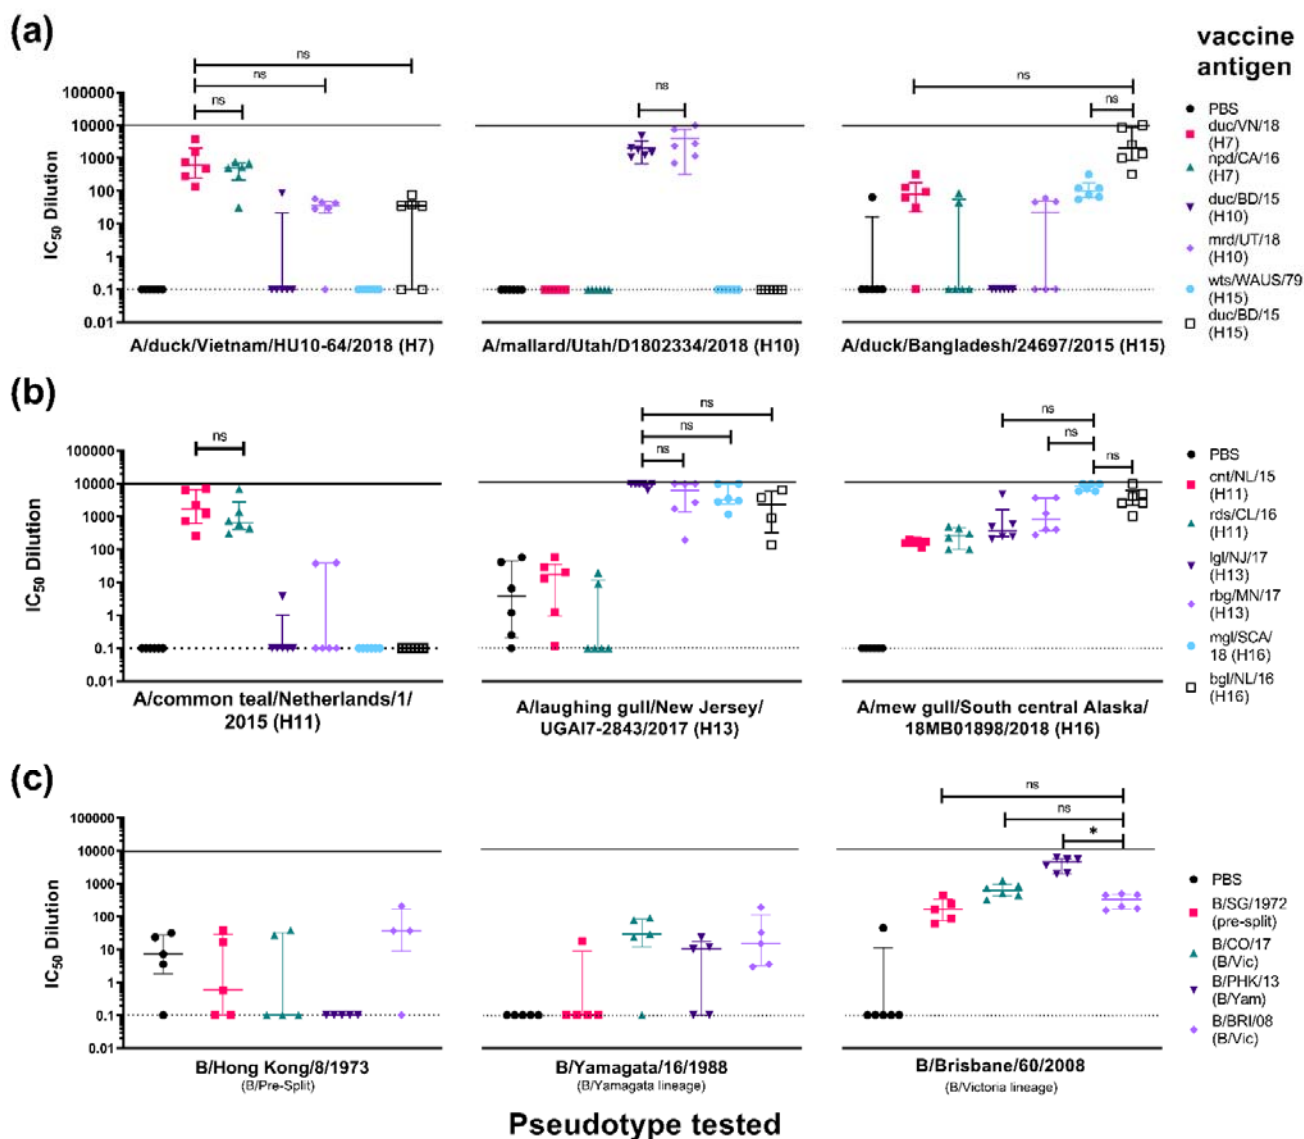

488  
 489 **Figure 9.** *In vitro* neutralizing activity as shown by IC<sub>50</sub> dilution of mouse sera vaccinated with HA antigens  
 490 from closest phylogenetically related IAV subtypes, (a) H7, H10, and H15, (b) H11, H13 and H16, and (c) IBV  
 491 HA antigens from pre-split, Yamagata and Victoria like-lineages. Neutralizing activity of sera from vaccinated  
 492 mice were tested against homologous and heterologous strains from the same subtype and a representative  
 493 strain within the related subtypes. (a) IAV H7/H10/H15 study. Six groups consisting of 6 mice each  
 494 (n=6/group) were vaccinated with 50 µg pEVAC expressing A/duck/Vietnam/HU10-64/2018 (H7) (duc/VN/18)  
 495 (pink square), A/northern pintail duck/California/UCD1582/2016 (H7) (npd/CA/16) (green triangle) (n=6),  
 496 A/duck/Bangladesh/24268/2015 (H10) (duc/BD/15) (violet inverted triangle), A/mallard/Utah/D1802334/2018  
 497 (H10) (mrd/UT/18) (purple diamond), A/wedge-tailed shearwater/Western Australia/2576/1979 (H15)  
 498 (wts/WAUS/79) (light blue circle), and A/duck/Bangladesh/24697/2015 (H15) (duc/BD/15) (hollow black  
 499 square), respectively. Terminal bleeds (70 dpi) were tested against H7 PV duc/VN/18, H10 PV mrd/UT/18,  
 500 and H15 PV duc/BD/15 as shown on the x-axes. (b) IAV H11/H13/H16 study. Six groups consisting of 6  
 501 mice each (n=6/group) were vaccinated with 50 µg pEVAC cloned with A/common teal/Netherlands/1/2015  
 502 (H11) (cnt/NL/15) (pink square), A/red/shoveler/Chile/C14653/2016 (H11) (rds/CL/16) (green triangle),  
 503 A/laughing gull/New Jersey/UGAI7-2843/2017 (H13) (lgl/NJ/17) (violet inverted triangle), A/ring-billed  
 504 gull/Minnesota/OPMNAI0816/2017 (H13) (rbg/MN/17) (purple diamond), A/black-headed  
 505 gull/Netherlands/1/2016 (H16) (bgl/NL/16) (light blue circle), and A/mew gull/South central Alas-  
 506 ka/18MB01898/2018 (H16) (mgl/SCA/18) (black hollow square). Terminal bleeds (70 dpi) were tested  
 507 against H11 PV cnt/NL/15, H13 PV lgl/NJ/17, and H16 PV mgl/SCA/18 as shown in the x-axes. (c) IBV cross  
 508 lineage study. Four groups of mice were vaccinated with 50 µg pEVAC cloned with B/Singapore/222/1979  
 509 (pre-split) (B/SG/1979) (pink square) (n=5), B/Colorado/06/2017 (B/Vic) (B/CO/17) (green triangle) (n=6),

510 B/Phuket/3073/2013 (B/Yam) (B/PHK/13) (violet inverted triangle) (n=6), and B/Brisbane/60/2008 (BVIC)  
511 (B/BRI/08) (purple diamond) (n=6), respectively. Terminal bleeds (70 dpi) were tested against a representative  
512 B pre-split PV, B/Hong Kong/8/1973, a representative B/Yamagata PV, B/Yamagata/16/1988, and B/Victoria  
513 PV B/Brisbane/60/2008 as shown in the x-axes. For all plots, an additional group of mice was vaccinated with  
514 PBS (n=5/6). Plots show the median and interquartile range of individual mouse serum samples per im-  
515 munization group. Solid line indicates an assigned maximum IC<sub>50</sub> dilution of 10,000 showing 100% neutral-  
516 ization and broken line shows an assigned baseline level of 0.1 indicating 0% neutralization. Comparisons of  
517 no significant difference (ns: p>0.05) and significant difference (\* p<0.05) among IC<sub>50</sub> values with antigen  
518 homologous to the PV being tested against is shown in brackets. In the case of (c), comparison is made with  
519 neutralization of antigen belonging to the same lineage as the PV it is tested against.

520 When sera were tested against Igl/NJ/17 (H13) (**Figure 9b, 2<sup>nd</sup> panel**), mice vaccinated with H11 anti-  
521 gens produced poor neutralizing responses. However, similar to what we observed in the H11 PV neutrali-  
522 zation (**Figure 9b, 1<sup>st</sup> panel**), there was no significant difference between the IC<sub>50</sub> values of groups vac-  
523 cinated with the other H13, rbg/MN/17 (H13), to that vaccinated with the homologous Igl/NJ/17 (H13) against  
524 the Igl/NJ/17 (H13) PV (**Figure 9b, 2<sup>nd</sup> panel**). In contrast to previous results (**Figure 9b, 1<sup>st</sup> panel**), cross  
525 subtype neutralizing activity was observed in sera from mice vaccinated with both H16 antigens showing a  
526 strong neutralization response, as there was no significant difference between the IC<sub>50</sub> values of these  
527 groups with those vaccinated with the homologous Igl/NJ/17 (H13) against the Igl/NJ/17 (H13) PV (**Figure**  
528 **9b, 2<sup>nd</sup> panel**). Looking at the phylogenetic tree (**Figure 4**), H11 is farther from H13 and H16, which may  
529 explain the lack of cross-subtype neutralization seen here. It is of note here that low level background neu-  
530 tralization was observed in sera of the negative control group against laughing gull/NJ/17 (H13) PV, this was  
531 not seen when this group was tested against the H11 or H16 PV.

532 Interestingly, all vaccination groups neutralized mgl/SCA/18 (H16) PV (**Figure 9b, 3<sup>rd</sup> panel**). Despite  
533 this, vaccinations with the other H16 antigen (bhg/NL/16 (H16)), and both H13 antigens achieved IC<sub>50</sub> titers  
534 which had no significant difference (n.s.) compared to the homologous mgl/SCA/18 (H16) vaccination against  
535 the mgl/SCA/18 (H16) PV (**Figure 9b, 3<sup>rd</sup> panel**). Neutralizing responses were also observed in sera of  
536 mice immunized with H11 antigens, albeit not as strong as that of the homologous, nonetheless these re-  
537 sponses were significantly different from the negative control mice sera (p<0.05) (**Figure 9b, 3<sup>rd</sup> panel**).

538 For the IBV study for groups tested against B/Hong Kong/1973 (B/HK/1973) PV, a pre-split IBV (**Figure**  
539 **9c, 1<sup>st</sup> panel**) (n=5 for all groups), no neutralization was observed in sera from mice regardless of the antigen  
540 they had been inoculated with including the pre-split antigen B/Singapore/1972 (B/SG/1972). None of the  
541 groups showed responses that were significantly different from sera collected from mice in the negative  
542 control group (PBS), which, incidentally, was showing some background against this PV. Most of the mice  
543 that were vaccinated with any of the antigens tested failed to reach 50% neutralization against the pre-split  
544 PV (**Figure 9c, 1<sup>st</sup> panel**).

545 When groups were tested against B/Yam/1988 (B/Yam) (**Figure 9c, 2<sup>nd</sup> panel**) (n=5), sera from mice  
546 vaccinated with B/SG/1972 (pre-split) did not show any neutralization, except for one outlier that was outside  
547 the upper extreme quartile. Neutralization was observed for sera from all other groups including, as ex-  
548 pected, those vaccinated with the antigen from Yamagata-like lineage (B/PHK/13) (**Figure 9b, 2<sup>nd</sup> panel**).  
549 Nonetheless, vaccination employing these antigens did not produce strong neutralizing responses against  
550 the B/Yam PV, as responses showed no significant difference with the PBS group, with IC<sub>50</sub> dilution values  
551 ranging from 0.1-100.

552 Results for groups tested against B/Bri/08 PV (**Figure 9c, 3<sup>rd</sup> panel**) were interesting; as sera from mice  
553 in all groups were able to neutralize this B/Vic PV. Sera from mice vaccinated with B/SG/1972 (pre-split) and  
554 the other B/Vic antigen, B/CO/17, achieved IC<sub>50</sub> dilution values which had no significant difference (n.s)  
555 compared to that vaccinated with the homologous B/Bri/08 (B/Vic) against the B/Bri/08 (B/Vic) PV (p>0.05).  
556 Sera from mice vaccinated with antigens from the other lineage, B/PHK/13 (B/Yam) achieved IC<sub>50</sub> titers which  
557 were higher than those observed for mice from the group vaccinated with homologous B/Bri/08 (BVIC) an-  
558 tigen (\*p<0.05) against B/Bri/08 (BVIC) PV. This suggests that vaccination with either pre-split, B/Yam or  
559 B/Vic lineage antigens produce a significant neutralizing response against this B/Victoria PV.

#### 561 3.4. *In vitro* neutralization of HA pseudotypes by HA-stem directed monoclonal antibodies

562 It is desirable to have antibodies that will elicit a broad, cross-subtype specific response in order to ad-  
563 dress a pandemic threat. The influenza pseudotype microneutralization (pMN) assay is highly sensitive and  
564 specific for detecting neutralizing antibodies against influenza viruses regardless if they are HA-head specific  
565 or are targeted against the HA stem, making it an excellent test of antibody functionality *in vitro* [55].



566 Several broadly reactive monoclonal antibodies have been developed for use in immunotherapy against  
567 influenza. Monoclonal antibody CR9114 binds to IBV from both lineages and additionally binds influenza A  
568 viruses from both group 1 and group 2 [79], and FI6 is a pan-influenza A neutralizing antibody [80]. Both  
569 CR9114 and FI6 bind to a highly-conserved epitope in the HA stem [79, 80] enabling them to broadly neu-  
570 tralize influenza viruses and providing protection against lethal influenza challenge *in vivo*. Here, we show  
571 neutralization of representative IAV and IBV PV by both mAbs (**Figure 10, Table 4**).  
572

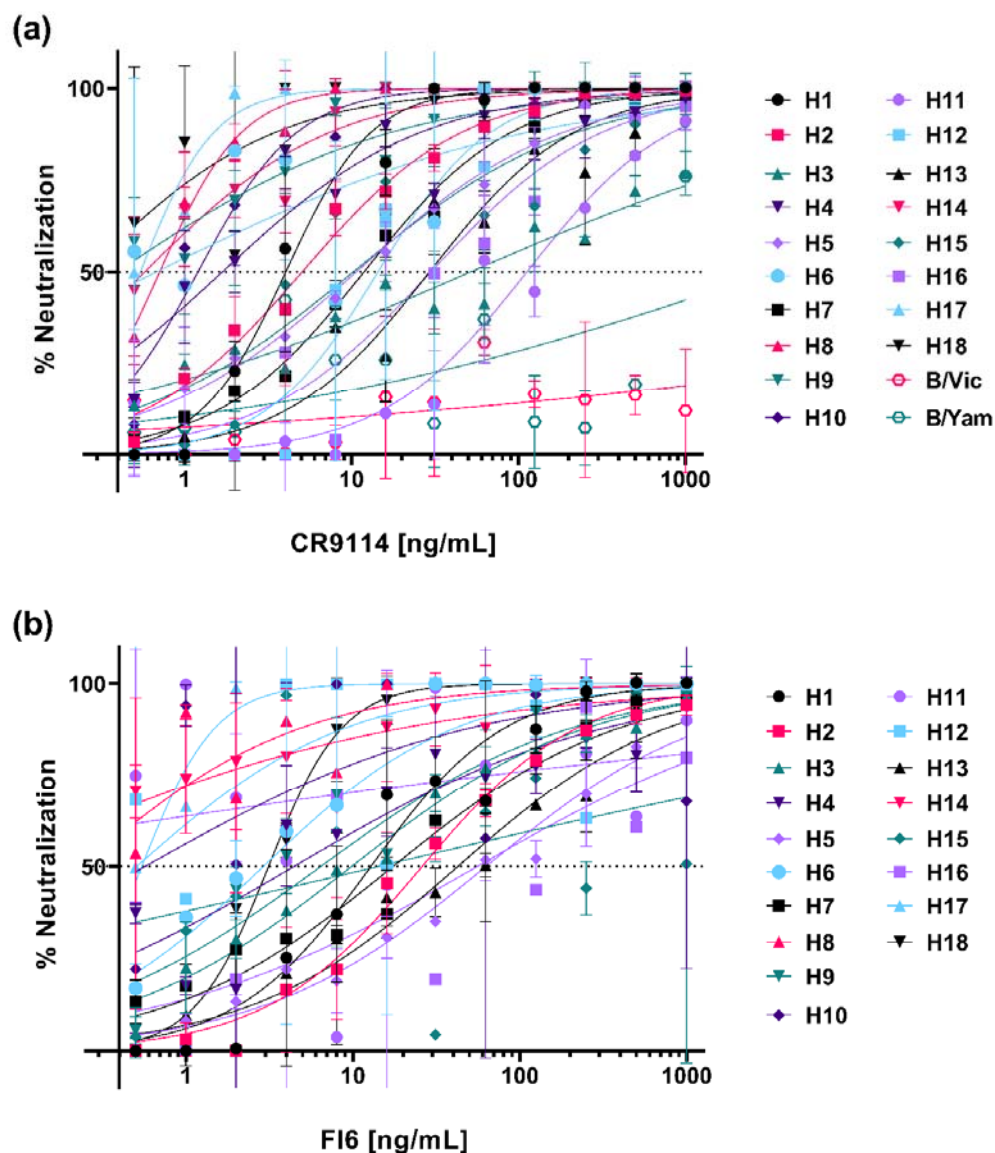

573

574 **Figure 10.** Neutralization of representative IAV and IBV PV *in vitro* by CR9114 and FI6. PV neutralization  
575 was measured by a luciferase reporter assay. (a) CR9114 and (b) FI6 were serially diluted two-fold from a  
576 starting concentration of 1000 ng/mL to 0.5 ng/mL against all pseudotypes. An input value of  $1.0 \times 10^6$  RLU of  
577 PV was then added to each well. For (a) and (b), each point represents the mean and standard deviation of  
578 two replicates per dilution. IBV strains were not tested against FI6.

579 Half-maximal inhibitory concentration ( $IC_{50}$ ) of both mAbs against the PV tested were determined. Dose  
580 response curves (**Figure 10**) were obtained by normalizing the RLU values against that of the pseudotype  
581 only controls corresponding to 0% neutralization and cell-only (no virus) controls corresponding to 100%  
582 neutralization. A non-linear regression (curve fit) analysis on the normalized data using a log [inhibitor] versus  
583 normalized response variable slope equation to compute for the  $IC_{50}$  values was then carried out. The  $IC_{50}$

584 values for CR9114 against all IAV PV tested were in the range of 0.3-120 ng/mL (**Table 4**). The IC<sub>50</sub> values  
585 for FI6 are more varied, with a range of 0.02-60 ng/mL (**Table 4**).

586 Both CR9114 and FI6 effectively neutralized key Group I Influenza A subtypes, H1, H2, H3, H5, H7, and  
587 H9 *in vitro* (**Figure 10, Table 4**). These representative IAV subtypes have been previously detected in the  
588 human population, including A(H1N1), A(H2N2), and A(H3N2), strains of which have previously caused  
589 global pandemics. Both mAbs were also able to neutralize all influenza PV representative strains from known  
590 avian subtypes for both IAV Group I (HA6, HA8, H11, H12, H13, and H16) and Group II (H4, H10, H14, and  
591 H15) (**Figure 10**). Notably, bat influenza H17 and H18 were also potently neutralized by CR9114 and FI6  
592 (**Table 4**). In contrast, CR9114 and FI6 showed no neutralization activity against any of the influenza B  
593 strains tested. This correlates with previous findings of CR9114 being unable to neutralize influenza B vi-  
594 ruses *in vitro* as tested using the classic microneutralization and hemagglutination inhibition assays [79].  
595 Some neutralization activity can be seen for CR9114 against B/Phuket/3073/2013, a B/Yamagata-like virus,  
596 at the highest concentration tested (1 µg/mL), but there was no dose-response established indicating no true  
597 neutralization. As FI6 is only expected to neutralize influenza A viruses, we did not test it against IBV PV.  
598

599 **Table 4.** IC<sub>50</sub> (half-maximal inhibitory concentration) values of CR9114 and FI6 against representative influ-  
600 enza PV *in vitro*. (-) indicates no neutralization. n.d. indicates experiment not done.

| <i>Pseudotype Virus (PV)</i> |                                                          | IC <sub>50</sub> [ng/mL] |       |
|------------------------------|----------------------------------------------------------|--------------------------|-------|
| Subtype                      | Strain                                                   | CR9114                   | FI6   |
| H1                           | A/England/195/2009                                       | 3.63                     | 13.25 |
| H2                           | A/quail/Rhode Island/16-018622-1/2016                    | 5.06                     | 26.70 |
| H3                           | A/ruddy turnstone/Delaware Bay/606/2017                  | 51.62                    | 9.83  |
| H4                           | A/Calidris ruficollis/Hokkaido/12EY0172/2012             | 1.68                     | 8.36  |
| H5                           | A/gyrfalcon/Washington/41088-6/2014                      | 10.74                    | 60.15 |
| H6                           | A/American wigeon/California/HS007A/2015                 | 0.68                     | 2.91  |
| H7                           | A/Shanghai/02/2013                                       | 11.88                    | 17.39 |
| H8                           | A/mallard duck/Ohio/16OS0672/2016                        | 0.71                     | 0.23  |
| H9                           | A/chicken/Israel/291417/2017                             | 0.39                     | 6.41  |
| H10                          | A/mallard/Utah/D1802334/2018                             | 1.26                     | 0.57  |
| H11                          | A/red shoveler/Chile/C14653/2016                         | 120.90                   | 0.02  |
| H12                          | A/duck/Mongolia/850/2018                                 | 15.06                    | 0.51  |
| H13                          | A/laughing gull/New Jersey/UGAI17-2843/2017              | 31.97                    | 52.05 |
| H14                          | A/blue-winged Teal/Ohio/18OS1695/2018                    | 0.58                     | 0.06  |
| H15                          | A/wedge-tailed shearwater/Western<br>Australia/2576/1979 | 10.73                    | 14.12 |
| H16                          | A/black-headed gull/Netherlands/1/2016                   | 45.41                    | 55.50 |
| H17                          | A/little yellow-shouldered bat/Guatemala/60/2010         | 0.54                     | 0.34  |
| H18                          | A/flat-faced bat/Peru/030/2010                           | 0.26                     | 3.14  |
| B                            | B/Hong Kong/8/1973                                       | -                        | n.d.  |
| B/Vic                        | B/Victoria/1/1987                                        | -                        | n.d.  |
| B/Yam                        | B/Yamagata/16/1988                                       | -                        | n.d.  |

601

#### 602 4. Discussion

603 Influenza infection contributes annually to morbidity and mortality in humans and in wild and domesti-  
604 cated animals worldwide even with vaccination programs already in place. There is additionally the ev-  
605 er-present threat of a pandemic brought about by novel influenza subtypes to which the population has no  
606 pre-existing immunity and of which seasonal vaccines may be unable to protect against. Lessons from the  
607 past have shown us, that despite our efforts, we are still unprepared to mitigate the devastating loss of life and  
608 livelihood when the next influenza pandemic occurs. Protection provided by current seasonal influenza virus  
609 vaccines is generally limited and relies on predictive science. Ideally, vaccines should be rapidly generated

610 upon the emergence of a novel threat and should be able to protect against both drifted and shifted strains,  
611 and this is the goal of a universal vaccine approach.

612 To aid in efforts to create a universal influenza vaccine and assist in pandemic preparedness, we have  
613 created a comprehensive influenza hemagglutinin pseudotype library. This library enables assessment of  
614 responses in lower containment settings thus negating the requirement for BSL3 facilities that are most  
615 commonly required when working with high risk influenza subtypes. Using pseudotypes also negates the  
616 need to isolate live viruses from clinical material, a process that is expensive and can be technically chal-  
617 lenging as well as potentially reducing the genetic authenticity of the isolated virus through egg adaptation.  
618 Once the HA sequence has been identified, this can be cloned into a suitable plasmid expression vector.  
619 Here we have utilized pI.18, pEVAC and pHCMV but other plasmids could be employed, and the amount of  
620 DNA required determined using the optimization described in this study. This will ensure the rapid production  
621 of high quality and high titer PV which can be utilized in a pMN assay following assembly. Addition of a lu-  
622 ciferase reporter plasmid produces results that can be determined rapidly using a system which has the  
623 potential to be upscaled to high throughput platforms. Additionally, PV can be stored at -80°C for extended  
624 periods of time and as was shown with H5, can be lyophilized and stored for up to 4 weeks at 37°C [81].  
625 Lyophilization could expand the potential to investigate and respond to pandemics or other outbreaks from  
626 any subtype at speed and without the need for cold chain storage.

627 The data presented in this study demonstrated the utility, versatility, and ease, of employing influenza  
628 hemagglutinin pseudotyped viruses in pre-clinical studies to further vaccine research using reference  
629 standards, improve vaccine antigen design, and to evaluate alternative therapies such as that of mAbs,  
630 against influenza. We have also shown that PV in this library are suitable for investigation of neutralization of  
631 sera collected from different species including mice, bats, sheep and chickens (**Figure 5, Table 2**). The  
632 pseudotype library has also been effective for use with neutralizing reference antisera (**Figure 5**), and this is  
633 integral to the vaccine strain selection process for seasonal influenza vaccines. Laboratories around the  
634 world that are part of the World Health Organization Global Influenza Surveillance and Response System  
635 monitor the antigenic phenotypes of circulating viruses to select vaccine strains for upcoming influenza  
636 seasons. However, investigation of emerging strains that could cause pandemics is limited, as it is arduous  
637 to isolate and propagate wildtype virus to test against. Our influenza pseudotype library can be employed to  
638 test protection offered by existing vaccines and antisera used in their selection, in this instance, as tools for  
639 surveillance and pandemic preparedness.

640 We have conducted several preliminary immunogenicity trials with selected vaccine antigens to inform  
641 the design of pivotal trials and to provide possible initial evaluation of vaccine efficacy employing our IAV and  
642 IBV pseudotypes. Other screening tools employ assays that evaluate the presence of binding antibodies but  
643 are unable to determine if these antibodies are functionally useful within samples. A common screening tool  
644 is the Enzyme Linked Immunosorbent Assay (ELISA) which can measure total antibody (e.g. total IgG) that  
645 binds to selected antigens. However, only a proportion of the total antibody detected will be capable of  
646 inhibiting viral infection and this should be heavily taken into consideration when deciding how to measure the  
647 humoral immune response. Alternatively, the immune response may be assessed by neutralization assays  
648 employing native virus or viral pseudotypes. The latter can be carried out at BSL2 and allow a rapid, reliable,  
649 safe and easy assessment of humoral immune responses of vaccine antigens against influenza subtypes  
650 which are difficult to isolate and propagate.

651 We were able to show that immunization with prospective vaccine antigens and subsequent collection of  
652 blood serum samples at appropriate time intervals can be used to evaluate immune responses that are  
653 relevant to dosing strategies going forward (**Figure 6**). The data generated could inform the appropriate  
654 periods between doses and the number of doses that could provide the optimal immune response. In our  
655 immune response monitoring study, we found that immunization with 50 µg pEVAC HA four times in 2-week  
656 intervals, produced optimal titers after the 4<sup>th</sup> inoculation with immune responses at 56 and 70 days post  
657 immunization showing no significant difference (**Figure 6d**). Additionally, for vaccines, it may also be useful to  
658 explore the shortest time frame within which doses may be completed without a detrimental effect on the final  
659 immune response. Our results indicate that employing our immunization and dosing strategy, a 4<sup>th</sup> im-  
660 munization with pEVAC HA is necessary to achieve maximal titers, as lower titers were achieved with only 3  
661 compared to 4 immunizations (**Figure 6**). This could be extended in the future to explore prime boost regi-  
662 mens with alternative vectors or proteins.

663 We also ran investigative trials wherein all mice received the same pEVAC HA vaccine antigen and we  
664 performed additional testing using relevant representative PV strains belonging to the same subtype (**Fig-  
665 ures 7 and 8**). Our findings provide an indication as to whether immunization with a particular strain of the  
666 subtype can neutralize drifted strains of the same subtype, which is very important for lasting vaccine efficacy  
667 and protection especially in the case of influenza. This additional testing can also provide an assessment of

668 the robustness and breadth of the humoral immune responses elicited by the vaccine to avian and human  
669 strains of the same subtype in the case of IAV and can guide vaccine strain or antigen selection in a vaccine  
670 to improve or maintain its protective effect.

671 We have also looked at comparing immune response against phylogenetically related subtypes to in-  
672 vestigate cross-subtype neutralization that can be brought about by vaccination (**Figure 9**). Here, we have  
673 also selected IAV strains that are not usually studied, H10, H11, H13, H15, and H16, together with IBV from  
674 both lineages. Findings may aid in the development of a vaccine for pandemic purposes or inform possible  
675 pre-existing immune responses in the population. Immune responses generated by vaccination with an HA  
676 antigen against the homologous PV was successful in all groups tested (**Figures 6-9**). These can be used  
677 as control groups for future vaccination experiments. We have found that cross-subtype protection is rare and  
678 neutralizing responses not as strong as the homologous antigen against the PV. Several vaccinations, that  
679 of an H7 antigen which showed neutralization against an H10 and H15 PV (**Figure 9a, 1<sup>st</sup> panel**), H13 and  
680 H16 antigens showing cross neutralization with each other (**Figure 9b**), and and B/Yamagata-lineage vac-  
681 cinated mice neutralizing B/Victoria-lineage PV (**Figure 9c**). Nonetheless, our pseudotype library has en-  
682 abled us to test immune responses brought about by vaccination against a variety of IAV and IBV  
683 pseudotypes. This is a promising *in vitro* screening procedure to guide pre-clinical studies.

684 In addition to vaccination and antiviral drugs [48], the use of recombinant monoclonal antibodies that are  
685 broadly neutralizing against influenza is a promising strategy to counter annual epidemics and pandemic  
686 threats especially in individuals with severe disease. These mAbs, several of which are already in clinical  
687 development, bind to functionally conserved epitopes such as those in the influenza hemagglutinin (HA)  
688 stem, thereby providing strain independent protection [79, 80, 82-84]. For a time, discovery of these broadly  
689 neutralizing antibodies has been hampered by the lack of assays to properly show neutralization afforded by  
690 these mAbs that is exclusive from hemagglutination inhibition of HA-head directed antibodies. Antibodies  
691 that target the HA stem do not inhibit hemagglutination inhibition [85] and are thought to neutralize influenza  
692 via other mechanisms. We have successfully employed our pseudotype library to investigate neutralizing  
693 activity of HA stem-directed mAbs CR9114 and FI6 against representative IAV and IBV PV available. For  
694 instance, we could confirm that CR9114, despite binding to IBV HA, does not neutralize IBV *in vitro*. This is an  
695 invaluable tool to test functionality of new immunotherapies against influenza *in vitro*.

696 This library is expanding as influenza continues to undergo antigenic changes to the HA protein. We  
697 believe it can be part of a toolbox of assays that can be made available to researchers and will be especially  
698 helpful for studies investigating alternative and innovative influenza vaccine targets. This method employs a  
699 system that has the potential to be high throughput, can be easily adapted to other reporters such as GFP,  
700 and may be incorporated into large scale clinical trials and surveillance programs. The PV can also be  
701 further developed in an ELISA where it will display the HA trimer in its native form and can be used to dis-  
702 tinguish HA stalk responses and quaternary epitopes. Lentiviral PV can be constructed to display other  
703 potential vaccine targets such as NA and in future, we plan to complete a full NA PV library to complement our  
704 HA library. Additionally, these PV could be used to observe glycosylation patterns and their influence on  
705 neutralization of influenza. We believe that our influenza PV library will be an invaluable tool for research  
706 and would be impactful in the development of solutions against the changing face of influenza.

707  
708 **Supplementary Materials:** Supplementary Table S1. List of influenza hemagglutinin pseudotypes (PV) available at  
709 the Viral Pseudotype Unit, University of Kent. This will be dynamically updated and latest version posted to figshare:  
710 [https://figshare.com/authors/Nigel\\_Temperton/438525](https://figshare.com/authors/Nigel_Temperton/438525)

711  
712 **Author Contributions:** Conceived and designed experiments – JMD, KDC, FF, GC, JH, NT. Performed experiments  
713 – JMD, KDC, GC, MF. Analyzed the data – JMD, KDC, GC, NT. Plasmid preparation – BA, RW. Flu antigen design  
714 – DW, BA, RW. Reagent provision – RK, JH, AB, CS, VA. Wrote the paper – JMD, KD. Revised the paper – BA, SS,  
715 RW, GC, JH, NT. All authors reviewed and accepted the final version of the manuscript.

716  
717 **Funding:** NT: KdC and GC receive funding from the Bill and Melinda Gates Foundation: Grand Challenges Universal  
718 Influenza Vaccines Award: Ref: G101404. NT and JMD receive funding from Innovate UK, UK Research and Innova-  
719 tion (UKRI) for the project: Digital Immune Optimized and Selected Pan-Influenza Vaccine Antigens (DIOS-PIVa) Award  
720 Ref: 105078. RW receives funding from EC FETopen (Virofight, Grant 899619). CS receives funding from the De-  
721 partment of Science and Technology of South Africa cost Centre P10000029.

722  
723 **Institutional Review Board Statement:** Ethical approval for collection of bat surveillance sera was received from the  
724 Animal Ethics Committee and Research Ethics Committee of University of Pretoria, with certificate numbers V092-18  
725 and REC097-18, respectively. Approval to sample bat populations (VDS/194/S.4/11/T/85) was obtained from the Di-  
726 rector/Chief Veterinary Officer of Nigeria, Department of Veterinary and Pest Control Services, Federal Ministry of Ag-

727 riculture and Pest Control Services, Abuja Nigeria. Mouse studies were approved by the Animal Welfare Ethical Re-  
728 view Body, University of Cambridge (Project license P8143424B).

729  
730 **Conflicts of Interest:** The authors declare no conflict of interest. The funders had no role in the design of the study; in  
731 the collection, analyses, or interpretation of data; in the writing of the manuscript, or in the decision to publish the results.

## 732 References

- 733 1. Bouvier, N.M. and Lowen, A.C. Animal Models for Influenza Virus Pathogenesis and Transmission. *Viruses*, 2010. **2**(8): p.  
734 1530-1563.
- 735 2. Bouvier, N.M. and Palese, P. The biology of influenza viruses. *Vaccine*, 2008. **26**: p. D49-D53.
- 736 3. Cauldwell, A.V., Long, J.S., Moncorgé, O., and Barclay, W.S. Viral determinants of influenza A virus host range. *Journal of*  
737 *General Virology*, 2014. **95**(6): p. 1193-1210.
- 738 4. Long, J.S., Mistry, B., Haslam, S.M., and Barclay, W.S. Host and viral determinants of influenza A virus species specificity.  
739 *Nature Reviews Microbiology*, 2019. **17**(2): p. 67-81.
- 740 5. Tong, S., Zhu, X., Li, Y., Shi, M., Zhang, J., Bourgeois, M., Yang, H., Chen, X., Recuenco, S., Gomez, J., Chen, L.M.,  
741 Johnson, A., Tao, Y., Dreyfus, C., Yu, W., McBride, R., Carney, P.J., Gilbert, A.T., Chang, J., Guo, Z., Davis, C.T., Paulson,  
742 J.C., Stevens, J., Rupprecht, C.E., Holmes, E.C., Wilson, I.A., and Donis, R.O. New world bats harbor diverse influenza A  
743 viruses. *PLoS Pathog*, 2013. **9**(10): p. e1003657.
- 744 6. World Health Organization. Influenza virus infection in humans. 2014; Available from:  
745 [http://www.who.int/influenza/human\\_animal\\_interface/virology\\_laboratories\\_and\\_vaccines/influenza\\_virus\\_infections\\_humans\\_feb14.pdf?ua=1](http://www.who.int/influenza/human_animal_interface/virology_laboratories_and_vaccines/influenza_virus_infections_humans_feb14.pdf?ua=1).
- 747 7. World Health Organization. Influenza (Seasonal). 2018; Available from:  
748 [http://www.who.int/news-room/fact-sheets/detail/influenza-\(seasonal\)](http://www.who.int/news-room/fact-sheets/detail/influenza-(seasonal)).
- 749 8. Hobbelen, P.H.F., Elbers, A.R.W., Werkman, M., Koch, G., Velkers, F.C., Stegeman, A., and Hagenaars, T.J. Estimating  
750 the introduction time of highly pathogenic avian influenza into poultry flocks. *Sci Rep*, 2020. **10**(1): p. 12388.
- 751 9. Russell, C.J., Hu, M., and Okda, F.A. Influenza Hemagglutinin Protein Stability, Activation, and Pandemic Risk. *Trends*  
752 *Microbiol*, 2018.
- 753 10. Bodewes, R., Morick, D., de Mutsert, G., Osinga, N., Bestebroer, T., van der Vliet, S., Smits, S.L., Kuiken, T.,  
754 Rimmelzwaan, G.F., Fouchier, R.A.M., and Osterhaus, A.D.M.E. Recurring influenza B virus infections in seals. *Emerging*  
755 *infectious diseases*, 2013. **19**(3): p. 511-512.
- 756 11. Osterhaus, A.D., Rimmelzwaan, G.F., Martina, B.E., Bestebroer, T.M., and Fouchier, R.A.M. Influenza B virus in seals.  
757 *Science (New York, N.Y.)*, 2000. **288**(5468): p. 1051 -- 1053.
- 758 12. de Vries, R.P., de Vries, E., Bosch, B.J., de Groot, R.J., Rottier, P.J.M., and de Haan, C.A.M. The influenza A virus  
759 hemagglutinin glycosylation state affects receptor-binding specificity. *Virology*, 2010. **403**(1): p. 17-25.
- 760 13. Skehel, J.J. and Wiley, D.C. Receptor Binding and Membrane Fusion in Virus Entry: The Influenza Hemagglutinin. *Annu.*  
761 *Rev. Biochem.*, 2000. **69**: p. 531-69.
- 762 14. Wiley, D.C. and Skehel, J.J. The Structure and Function of the Hemagglutinin Membrane Glycoprotein of Influenza Virus.  
763 *Ann. Rev. Biochem.*, 1987. **56**: p. 365-94.
- 764 15. Gamblin, S.J. and Skehel, J.J. Influenza hemagglutinin and neuraminidase membrane glycoproteins. *J Biol Chem*, 2010.  
765 **285**(37): p. 28403-9.
- 766 16. Russell, R.J., Gamblin, S.J., Haire, L.F., Stevens, D.J., Xiao, B., Ha, Y., and Skehel, J.J. H1 and H7 influenza  
767 haemagglutinin structures extend a structural classification of haemagglutinin subtypes. *Virology*, 2004. **325**(2): p. 287-96.
- 768 17. Rota, P.A., Wallis, T.R., Harmon, M.W., Rota, J.S., Kendal, A.P., and Nerome, K. Cocirculation of two distinct evolutionary  
769 lineages of influenza type B virus since 1983. *Virology*, 1990. **175**(1): p. 59-68.

- 770 18. Benton, D.J., Nans, A., Calder, L.J., Turner, J., Neu, U., Lin, Y.P., Ketelaars, E., Kallewaard, N.L., Corti, D., Lanzavecchia,  
771 A., Gamblin, S.J., Rosenthal, P.B., and Skehel, J.J. Influenza hemagglutinin membrane anchor. *Proceedings of the*  
772 *National Academy of Sciences*, 2018. **115**: p. 10112-10117.
- 773 19. Wilson, I.A., Skehel, J.J., and Wiley, D.C. Structure of the haemagglutinin membrane glycoprotein of influenza virus at 3 Å  
774 resolution. *Nature*, 1981. **289**(5796): p. 366-73.
- 775 20. Kirkpatrick, E., Qiu, X., Wilson, P.C., Bahl, J., and Krammer, F. The influenza virus hemagglutinin head evolves faster than  
776 the stalk domain. *Sci Rep*, 2018. **8**(1): p. 10432.
- 777 21. Shih, A.C.-C., Hsiao, T.-C., Ho, M.-S., and Li, W.-H. Simultaneous amino acid substitutions at antigenic sites drive  
778 influenza A hemagglutinin evolution. *Proceedings of the National Academy of Sciences*, 2007. **104**: p. 6283-6288.
- 779 22. Bizebard, T., Gigant, B., Rigolet, P., Rasmussen, B., Diat, O., B  secke, P., Wharton, S.A., Skehel, J.J., and Knossow, M.  
780 Structure of influenza virus haemagglutinin complexed with a neutralizing antibody. *Nature*, 1995. **376**(6535): p. 92-94.
- 781 23. Gao, J., Couzens, L., Burke, D.F., Wan, H., Wilson, P., Memoli, M.J., Xu, X., Harvey, R., Wrarmert, J., Ahmed, R.,  
782 Taubenberger, J.K., Smith, D.J., Fouchier, R.A.M., and Eichelberger, M.C. Antigenic Drift of the Influenza A(H1N1)pdm09  
783 Virus Neuraminidase Results in Reduced Effectiveness of A/California/7/2009 (H1N1pdm09)-Specific Antibodies. *MBio*,  
784 2019. **10**(2).
- 785 24. Kasson, P.M. and Pande, V.S. Combining mutual information with structural analysis to screen for functionally important  
786 residues in influenza hemagglutinin. *Pacific Symposium on Biocomputing. Pacific Symposium on Biocomputing*, 2009: p.  
787 492-503.
- 788 25. Popova, L., Smith, K., West, A.H., Wilson, P.C., James, J.A., Thompson, L.F., and Air, G.M. Immunodominance of  
789 Antigenic Site B over Site A of Hemagglutinin of Recent H3N2 Influenza Viruses. *PLOS ONE*, 2012. **7**(7): p. e41895.
- 790 26. Wiley, D.C., Wilson, I.A., and Skehel, J.J. Structural identification of the antibody-binding sites of Hong Kong influenza  
791 haemagglutinin and their involvement in antigenic variation. *Nature*, 1981. **289**(5796): p. 373-8.
- 792 27. Wilson, J.R., Guo, Z., Tzeng, W.-P., Garten, R.J., Xiyan, X., Blanchard, E.G., Blanchfield, K., Stevens, J., Katz, J.M., and  
793 York, I.A. Diverse antigenic site targeting of influenza hemagglutinin in the murine antibody recall response to  
794 A(H1N1)pdm09 virus. *Virology*, 2015. **485**: p. 252-262.
- 795 28. Johnson, N.P. and Mueller, J. Updating the accounts: global mortality of the 1918-1920 "Spanish" influenza pandemic. *Bull*  
796 *Hist Med*, 2002. **76**(1): p. 105-15.
- 797 29. Lee, V.J., Chen, M.I., Chan, S.P., Wong, C.S., Cutter, J., Goh, K.T., and Tambyah, P.A. Influenza pandemics in Singapore,  
798 a tropical, globally connected city. *Emerging infectious diseases*, 2007. **13**(7): p. 1052-1057.
- 799 30. Taubenberger, J.K. and Morens, D.M. Influenza: The Once and Future Pandemic. *Public Health Reports*, 2010. **125**.
- 800 31. Viboud, C., Simonsen, L., Fuentes, R., Flores, J., Miller, M.A., and Chowell, G. Global Mortality Impact of the 1957-1959  
801 Influenza Pandemic. *J Infect Dis*, 2016. **213**(5): p. 738-45.
- 802 32. Dalby, A.R. and Iqbal, M. The European and Japanese outbreaks of H5N8 derive from a single source population providing  
803 evidence for the dispersal along the long distance bird migratory flyways. *PeerJ*, 2015. **3**: p. e934.
- 804 33. Isoda, N., Twabela, A.T., Bazarraghaa, E., Ogasawara, K., Hayashi, H., Wang, Z.-J., Kobayashi, D., Watanabe, Y., Saito,  
805 K., Kida, H., and Sakoda, Y. Re-Invasion of H5N8 High Pathogenicity Avian Influenza Virus Clade 2.3.4.4b in Hokkaido,  
806 Japan, 2020. *Viruses*, 2020. **12**(12).
- 807 34. Lewis, N.S., Banyard, A.C., Whittard, E., Karibayev, T., Al Kafagi, T., Chvala, I., Byrne, A., Meruyert, S., King, J., Harder, T.,  
808 Grund, C., Essen, S., Reid, S.M., Brouwer, A., Zinyakov, N.G., Tegzhanov, A., Irza, V., Pohlmann, A., Beer, M., Fouchier,  
809 R.A.M., Akhmetzhan, S., and Brown, I.H. Emergence and spread of novel H5N8, H5N5 and H5N1 clade 2.3.4.4 highly  
810 pathogenic avian influenza in 2020. *Emerging Microbes & Infections*, 2021. **10**(1): p. 148-151.

- 811 35. Vigeveno, R.M., Poen, M.J., Parker, E., Holwerda, M., de Haan, K., van Montfort, T., Lewis, N.S., Russell, C.A., Fouchier,  
812 R.A.M., de Jong, M.D., and Eggink, D. Outbreak Severity of Highly Pathogenic Avian Influenza A(H5N8) Viruses Is  
813 Inversely Correlated to Polymerase Complex Activity and Interferon Induction. *Journal of Virology*, 2020. **94**.
- 814 36. Shi, J., Deng, G., Kong, H., Gu, C., Ma, S., Yin, X., Zeng, X., Cui, P., Chen, Y., Yang, H., Wan, X., Wang, X., Liu, L., Chen,  
815 P., Jiang, Y., Liu, J., Guan, Y., Suzuki, Y., Li, M., Qu, Z., Guan, L., Zang, J., Gu, W., Han, S., Song, Y., Hu, Y., Wang, Z., Gu,  
816 L., Yang, W., Liang, L., Bao, H., Tian, G., Li, Y., Qiao, C., Jiang, L., Li, C., Bu, Z., and Chen, H. H7N9 virulent mutants  
817 detected in chickens in China pose an increased threat to humans. *Cell Res*, 2017. **27**(12): p. 1409-1421.
- 818 37. Subbarao, K. Avian influenza H7N9 viruses: a rare second warning. *Cell Res*, 2018. **28**(1): p. 1-2.
- 819 38. Zhou, L., Chen, E., Bao, C., Xiang, N., Wu, J., Wu, S., Shi, J., Wang, X., Zheng, Y., Zhang, Y., Ren, R., Greene, C.M.,  
820 Havers, F., Iuliano, A.D., Song, Y., Li, C., Chen, T., Wang, Y., Li, D., Ni, D., Zhang, Y., Feng, Z., Uyeki, T.M., and Li, Q.  
821 Clusters of Human Infection and Human-to-Human Transmission of Avian Influenza A(H7N9) Virus, 2013-2017. *Emerg*  
822 *Infect Dis*, 2018. **24**(2).
- 823 39. Nachbagauer, R., Feser, J., Naficy, A., Bernstein, D.I., Guptill, J., Walter, E.B., Berlanda-Scorza, F., Stadlbauer, D., Wilson,  
824 P.C., Aydillo, T., Behzadi, M.A., Bhavsar, D., Bliss, C., Capuano, C., Carreño, J.M., Chromikova, V., Claeys, C., Coughlan,  
825 L., Freyn, A.W., Gast, C., Javier, A., Jiang, K., Mariottini, C., McMahon, M., McNeal, M., Solórzano, A., Strohmeier, S., Sun,  
826 W., Van der Wielen, M., Innis, B.L., García-Sastre, A., Palese, P., and Krammer, F. A chimeric hemagglutinin-based  
827 universal influenza virus vaccine approach induces broad and long-lasting immunity in a randomized, placebo-controlled  
828 phase I trial. *Nature Medicine*, 2021. **27**(1): p. 106-114.
- 829 40. Beran, J., Peeters, M., Dewé, W., Raupachová, J., Hobzová, L., and Devaster, J.-M. Immunogenicity and safety of  
830 quadrivalent versus trivalent inactivated influenza vaccine: a randomized, controlled trial in adults. *BMC Infectious*  
831 *Diseases*, 2013. **13**(1): p. 224.
- 832 41. Pépin, S., Donazzolo, Y., Jambrecina, A., Salamand, C., and Saville, M. Safety and immunogenicity of a quadrivalent  
833 inactivated influenza vaccine in adults. *Vaccine*, 2013. **31**(47): p. 5572-5578.
- 834 42. Estrada, L.D. and Schultz-Cherry, S. Development of a Universal Influenza Vaccine. *The Journal of Immunology*, 2019. **202**:  
835 p. 392-398.
- 836 43. Subbarao, K. and Matsuoka, Y. The prospects and challenges of universal vaccines for influenza. *Trends in microbiology*,  
837 2013. **21**(7): p. 350-358.
- 838 44. Chatziprodomidou, I.P., Arvanitidou, M., Guitian, J., Apostolou, T., Vantarakis, G., and Vantarakis, A. Global avian  
839 influenza outbreaks 2010-2016: a systematic review of their distribution, avian species and virus subtype. *Syst Rev*, 2018.  
840 **7**(1): p. 17.
- 841 45. Del Rosario, J.M.M., Smith, M., Zaki, K., Riskey, P., Temperton, N., Engelhardt, O.G., Collins, M., Takeuchi, Y., and Hufton,  
842 S.E. Protection From Influenza by Intramuscular Gene Vector Delivery of a Broadly Neutralizing Nanobody Does Not  
843 Depend on Antibody Dependent Cellular Cytotoxicity. *Frontiers in Immunology*, 2020. **11**: p. 627.
- 844 46. Kanjilal, S. and Mina, M.J. Passive immunity for the treatment of influenza: quality not quantity. *The Lancet Respiratory*  
845 *Medicine*, 2019. **7**(11): p. 922-923.
- 846 47. Manenti, A., Maciola, A.K., Trombetta, C.M., Kistner, O., Casa, E., Hyseni, I., Razzano, I., Torelli, A., and Montomoli, E.  
847 Influenza Anti-Stalk Antibodies: Development of a New Method for the Evaluation of the Immune Responses to Universal  
848 Vaccine. *Vaccines*, 2020. **8**(1): p. 43.
- 849 48. Uyeki, T.M., Bernstein, H.H., Bradley, J.S., Englund, J.A., File, T.M., Fry, A.M., Gravenstein, S., Hayden, F.G., Harper, S.A.,  
850 Hirshon, J.M., Ison, M.G., Johnston, B.L., Knight, S.L., McGeer, A., Riley, L.E., Wolfe, C.R., Alexander, P.E., and Pavia,  
851 A.T. Clinical Practice Guidelines by the Infectious Diseases Society of America: 2018 Update on Diagnosis, Treatment,  
852 Chemoprophylaxis, and Institutional Outbreak Management of Seasonal Influenza. *Clin Infect Dis*, 2019. **68**(6): p. e1-e47.

- 853 49. WHO Global Influenza Surveillance Network. Manual for the Laboratory Diagnosis and Virological Surveillance of Influenza.  
854 2011; Available from:  
855 [http://www.who.int/influenza/gisrs\\_laboratory/manual\\_diagnosis\\_surveillance\\_influenza/en/index.html](http://www.who.int/influenza/gisrs_laboratory/manual_diagnosis_surveillance_influenza/en/index.html).
- 856 50. World Health Organization. Evaluation of influenza vaccine effectiveness: a guide to the design and interpretation of  
857 observational studies. . 2017.
- 858 51. Hobson, D., Curry, R.L., Beare, A.S., and Ward-Gardner, A. The role of serum haemagglutination-inhibiting antibody in  
859 protection against challenge infection with influenza A2 and B viruses. *The Journal of hygiene*, 1972. **70**(4): p. 767-777.
- 860 52. Alladi, C.S.H., Jagadesh, A., Prabhu, S.G., and Arunkumar, G. Hemagglutination Inhibition Antibody Response Following  
861 Influenza A(H1N1)pdm09 Virus Natural Infection: A Cross-Sectional Study from Thirthahalli, Karnataka, India. *Viral*  
862 *Immunol*, 2019. **32**(5): p. 230-233.
- 863 53. Cox, R.J. Correlates of protection to influenza virus, where do we go from here? *Hum Vaccin Immunother*, 2013. **9**(2): p.  
864 405-8.
- 865 54. Agor, J.K. and Özaltın, O.Y. Models for predicting the evolution of influenza to inform vaccine strain selection. *Human*  
866 *vaccines & immunotherapeutics*, 2018. **14**(3): p. 678-683.
- 867 55. Carnell, G.W., Trombetta, C.M., Ferrara, F., Montomoli, E., and Temperton, N.J. Correlation of Influenza B  
868 Haemagglutination Inhibitor, Single-Radial Haemolysis and Pseudotype-Based Microneutralisation Assays for  
869 Immunogenicity Testing of Seasonal Vaccines. *Vaccines*, 2021. **9**(2).
- 870 56. Wallerström, S., Lagerqvist, N., Temperton, N.J., Cassmer, M., Moreno, A., Karlsson, M., Leijon, M., Lundkvist, Å., and  
871 Falk, K.I. Detection of antibodies against H5 and H7 strains in birds: evaluation of influenza pseudovirus particle  
872 neutralization tests. *Infection Ecology & Epidemiology*, 2014. **4**(1): p. 23011.
- 873 57. Carnell, G.W., Ferrara, F., Grehan, K., Thompson, C.P., and Temperton, N.J. Pseudotype-Based Neutralization Assays for  
874 Influenza: A Systematic Analysis. *Frontiers in Immunology*, 2015. **6**(161).
- 875 58. Temperton, N.J., Hoschler, K., Major, D., Nicolson, C., Manvell, R., Hien, V.M., Ha, D.Q., De Jong, M., Zambon, M.,  
876 Takeuchi, Y., and Weiss, R.A. A sensitive retroviral pseudotype assay for influenza H5N1-neutralizing antibodies. *Influenza*  
877 *and Other Respiratory Viruses*, 2007. **1**(3): p. 105-112.
- 878 59. Toon, K., Bentley, E.M., and Mattiuzzo, G. More Than Just Gene Therapy Vectors: Lentiviral Vector Pseudotypes for  
879 Serological Investigation. *Viruses*, 2021. **13**(2).
- 880 60. Naldini, L., Blömer, U., Gallay, P., Ory, D., Mulligan, R., Gage, F.H., Verma, I.M., and Trono, D. In Vivo Gene Delivery and  
881 Stable Transduction of Nondividing Cells by a Lentiviral Vector. *Science*, 1996. **272**: p. 263-267.
- 882 61. Zufferey, R., Nagy, D., Mandel, R.J., Naldini, L., and Trono, D. Multiply attenuated lentiviral vector achieves efficient gene  
883 delivery in vivo. *Nature Biotechnology*, 1997. **15**(9): p. 871-875.
- 884 62. World Health Organization Global influenza strategy 2019-2030. 2019.
- 885 63. Cox, R.J., Mykkeltvedt, E., Robertson, J., and Haaheim, L.R. Non-Lethal Viral Challenge of Influenza Haemagglutinin and  
886 Nucleoprotein DNA Vaccinated Mice Results in Reduced Viral Replication. *Scandinavian Journal of Immunology*, 2002.  
887 **55**(1): p. 14-23.
- 888 64. Raab, D., Graf, M., Notka, F., Schödl, T., and Wagner, R. The GeneOptimizer Algorithm: using a sliding window approach  
889 to cope with the vast sequence space in multiparameter DNA sequence optimization. *Systems and Synthetic Biology*, 2010.  
890 **4**(3): p. 215-225.
- 891 65. Böttcher, E., Matrosovich, T., Beyerle, M., Klenk, H.-D., Garten, W., and Matrosovich, M. Proteolytic Activation of Influenza  
892 Viruses by Serine Proteases TMPRSS2 and HAT from Human Airway Epithelium. *Journal of Virology*, 2006. **80**: p.  
893 9896-9898.



- 894 66. Bertram, S., Glowacka, I., Blazejewska, P., Soilleux, E., Allen, P., Danisch, S., Steffen, I., Choi, S.-Y., Park, Y., Schneider,  
895 H., Schughart, K., and Pöhlmann, S. TMPRSS2 and TMPRSS4 facilitate trypsin-independent spread of influenza virus in  
896 Caco-2 cells. *Journal of virology*, 2010. **84**(19): p. 10016-10025.
- 897 67. Ferrara, F. and Temperton, N. Pseudotype Neutralization Assays: From Laboratory Bench to Data Analysis. *Methods and*  
898 *Protocols*, 2018. **1**(1): p. 8.
- 899 68. Miller, M., Pfeiffer, W., and Schwartz, T. Creating the CIPRES Science Gateway for inference of large phylogenetic trees.  
900 *2010 Gateway Computing Environments Workshop (GCE)*, 2010: p. 1-8.
- 901 69. Zhang, Y., Aevermann, B.D., Anderson, T.K., Burke, D.F., Dauphin, G., Gu, Z., He, S., Kumar, S., Larsen, C.N., Lee, A.J.,  
902 Li, X., Macken, C., Mahaffey, C., Pickett, B.E., Reardon, B., Smith, T., Stewart, L., Suloway, C., Sun, G., Tong, L., Vincent,  
903 A.L., Walters, B., Zaremba, S., Zhao, H., Zhou, L., Zmasek, C., Klem, E.B., and Scheuermann, R.H. Influenza Research  
904 Database: An integrated bioinformatics resource for influenza virus research. *Nucleic Acids Research*, 2016. **45**(D1): p.  
905 D466-D474.
- 906 70. Bosch, F.X., Garten, W., Klenk, H.D., and Rott, R. Proteolytic Cleavage of Influenza Virus Hemagglutinins: Primary  
907 Structure of the Connecting Peptide between HA<sub>1</sub> and HA<sub>2</sub> Determines Proteolytic Cleavability and Pathogenicity of Avian  
908 Influenza Viruses. *Virology*, 1981. **113**: p. 725-735.
- 909 71. Böttcher-Friebertshäuser, E., Garten, W., Matrosovich, M., and Klenk, H.D. The Hemagglutinin: A Determinant of  
910 Pathogenicity, in *Influenza Pathogenesis and Control*, Compans, R.W. and Oldstone, M.B.A., Editors. 2014, Springer.
- 911 72. Garten, W. and Klenk, H.D. Understanding Influenza Virus Pathogenicity. *Trends in Microbiology*, 1999. **7**(3).
- 912 73. Ferrara, F., Molesti, E., Böttcher-Friebertshäuser, E., Cattoli, G., Corti, D., Scott, S.D., and Temperton, N.J. The human  
913 Transmembrane Protease Serine 2 is necessary for the production of Group 2 influenza A virus pseudotypes. *Journal of*  
914 *molecular and genetic medicine : an international journal of biomedical research*, 2012. **7**: p. 309-314.
- 915 74. World Health Organization/World Organisation for Animal, H.F. and Agriculture Organization, H.N.E.W.G. Revised and  
916 updated nomenclature for highly pathogenic avian influenza A (H5N1) viruses. *Influenza and Other Respiratory Viruses*,  
917 2014. **8**(3): p. 384-388.
- 918 75. World Health Organization, Avian influenza: assessing the pandemic threat. 2005.
- 919 76. Petrova, V.N. and Russell, C.A. The evolution of seasonal influenza viruses. *Nat Rev Microbiol*, 2018. **16**(1): p. 47-60.
- 920 77. Krammer, F. The human antibody response to influenza A virus infection and vaccination. *Nature Reviews Immunology*,  
921 2019. **19**(6): p. 383-397.
- 922 78. Krammer, F. and Palese, P. Advances in the development of influenza virus vaccines. *Nat Rev Drug Discov*, 2015. **14**(3): p.  
923 167-82.
- 924 79. Dreyfus, C., Laursen, N.S., Kwaks, T., Zuijdgeest, D., Khayat, R., Ekiert, D.C., Lee, J.H., Metlagel, Z., Bujny, M.V.,  
925 Jongeneelen, M., van der Vlugt, R., Lamrani, M., Korse, H.J., Geelen, E., Sahin, O., Sieuwerts, M., Brakenhoff, J.P., Vogels,  
926 R., Li, O.T., Poon, L.L., Peiris, M., Koudstaal, W., Ward, A.B., Wilson, I.A., Goudsmit, J., and Friesen, R.H. Highly  
927 conserved protective epitopes on influenza B viruses. *Science*, 2012. **337**(6100): p. 1343-8.
- 928 80. Corti, D., Voss, J., Gambelin, S.J., Codoni, G., Macagno, A., Jarrossay, D., Vachieri, S.G., Pinna, D., Minola, A., Vanzetta, F.,  
929 Silacci, C., Fernandez-Rodriguez, B.M., Agatic, G., Bianchi, S., Giacchetto-Sasselli, I., Calder, L., Sallusto, F., Collins, P.,  
930 Haire, L.F., Temperton, N., Langedijk, J.P., Skehel, J.J., and Lanzavecchia, A. A Neutralizing Antibody Selected from  
931 Plasma Cells That Binds to Group 1 and Group 2 Influenza A Hemagglutinins. *Science*, 2011. **333**(6044): p. 850-6.
- 932 81. Mather, S.T., Wright, E., Scott, S.D., and Temperton, N.J. Lyophilisation of influenza, rabies and Marburg lentiviral  
933 pseudotype viruses for the development and distribution of a neutralisation -assay-based diagnostic kit. *Journal of*  
934 *Virological Methods*, 2014. **210**: p. 51-58.
- 935 82. Ekiert, D., Bhabha, G., Elsliger, M.A., Friesen, R.H., Jongeneelen, M., Throsby, M., Goudsmit, J., and Wilson, I. Antibody  
936 Recognition of a Highly Conserved Influenza Virus Epitope. *Science*, 2009. **324**(5924): p. 246-51.

- 937 83. Sui, J., Hwang, W.C., Perez, S., Wei, G., Aird, D., Chen, L.M., Santelli, E., Stec, B., Cadwell, G., Ali, M., Wan, H., Murakami,  
938 A., Yammanuru, A., Han, T., Cox, N.J., Bankston, L.A., Donis, R.O., Liddington, R.C., and Marasco, W.A. Structural and  
939 functional bases for broad-spectrum neutralization of avian and human influenza A viruses. *Nat Struct Mol Biol*, 2009. **16**(3):  
940 p. 265-73.
- 941 84. Throsby, M., van den Brink, E., Jongeneelen, M., Poon, L.L., Alard, P., Cornelissen, L., Bakker, A., Cox, F., van Deventer,  
942 E., Guan, Y., Cinatl, J., ter Meulen, J., Lasters, I., Carsetti, R., Peiris, M., de Kruijff, J., and Goudsmit, J. Heterosubtypic  
943 neutralizing monoclonal antibodies cross-protective against H5N1 and H1N1 recovered from human IgM+ memory B cells.  
944 *PLoS One*, 2008. **3**(12): p. e3942.
- 945 85. Laursen, N.S. and Wilson, I.A. Broadly neutralizing antibodies against influenza viruses. *Antiviral Res*, 2013. **98**(3): p.  
946 476-83.  
947  
948
